# Supplementary material for: Comparative study on the composition of four different varieties of garlic
Source: PeerJ journal article supplement (doi:10.7717/peerj.6442), 2019-02-21

Sample Information

Analyzed by : Admin  
 Analyzed : 2018-5-7 16:45:49  
 Sample Type : Unknown  
 Level # : 1  
 Sample Name : 2018-5-7-1-2  
 Sample ID :  
 IS Amount : [1]=1.000  
 Sample Amount : 1.000  
 Dilution Factor : 1.000  
 Vial # : 1  
 Injection Volume : 1.000  
 Data File : E:\陈存\GC-MS硫化物\2018-5-7-1-2.qgd  
 Org Data File : E:\刘春宏\2018-5-7-1-2.qgd  
 Method File : E:\刘春宏\2018-5-7-1.qgm  
 Org Method File : E:\刘春宏\2018-5-7-1.qgm  
 Report File :  
 Tuning File : C:\GCMSsolution\System\Tune1\2017-3-21.qgt  
 Modified by : Admin  
 Modified : 2018-5-7 17:14:49

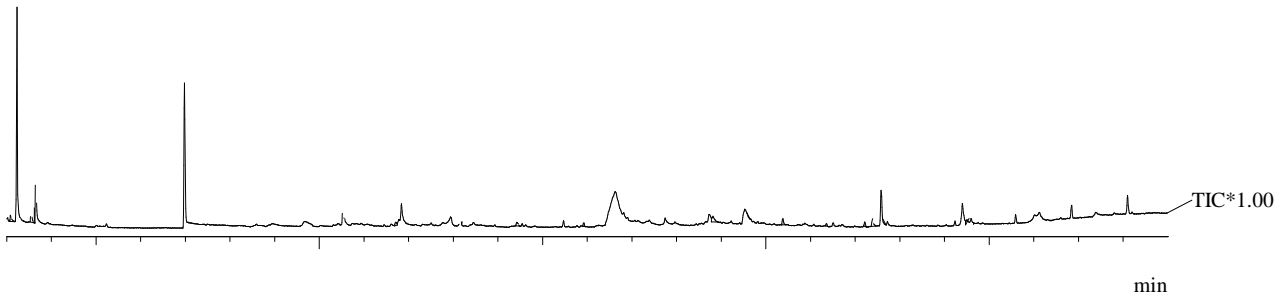

| Peak# | R.Time | I.Time | F.Time | Area     | Area%  | Height   | Height% | A/H   | Mark | Name |
|-------|--------|--------|--------|----------|--------|----------|---------|-------|------|------|
| 1     | 3.086  | 3.067  | 3.167  | 6197082  | 22.40  | 3995037  | 39.27   | 1.55  |      |      |
| 2     | 3.544  | 3.517  | 3.617  | 535090   | 1.93   | 330896   | 3.25    | 1.61  |      |      |
| 3     | 6.982  | 6.942  | 7.050  | 4717647  | 17.05  | 2594017  | 25.50   | 1.81  |      |      |
| 4     | 11.708 | 11.675 | 11.750 | 161011   | 0.58   | 60734    | 0.60    | 2.65  |      |      |
| 5     | 11.840 | 11.808 | 11.942 | 1091518  | 3.94   | 374763   | 3.68    | 2.91  | V    |      |
| 6     | 12.943 | 12.892 | 13.025 | 316829   | 1.14   | 110250   | 1.08    | 2.87  |      |      |
| 7     | 14.426 | 14.383 | 14.492 | 204120   | 0.74   | 66653    | 0.66    | 3.06  |      |      |
| 8     | 15.923 | 15.892 | 15.967 | 103541   | 0.37   | 61036    | 0.60    | 1.69  |      |      |
| 9     | 16.626 | 16.392 | 16.783 | 7566252  | 27.34  | 574594   | 5.65    | 13.16 |      |      |
| 10    | 16.825 | 16.783 | 16.883 | 654212   | 2.36   | 153466   | 1.51    | 4.26  | V    |      |
| 11    | 18.825 | 18.783 | 18.917 | 391361   | 1.41   | 93736    | 0.92    | 4.17  | V    |      |
| 12    | 19.528 | 19.450 | 19.650 | 1398141  | 5.05   | 231960   | 2.28    | 6.02  |      |      |
| 13    | 20.381 | 20.342 | 20.450 | 231609   | 0.84   | 109224   | 1.07    | 2.12  |      |      |
| 14    | 21.358 | 21.325 | 21.408 | 81332    | 0.29   | 50445    | 0.50    | 1.61  |      |      |
| 15    | 22.216 | 22.183 | 22.258 | 147412   | 0.53   | 84145    | 0.83    | 1.75  |      |      |
| 16    | 22.390 | 22.350 | 22.458 | 333099   | 1.20   | 134552   | 1.32    | 2.47  |      |      |
| 17    | 22.584 | 22.458 | 22.692 | 1475557  | 5.33   | 643402   | 6.32    | 2.29  | V    |      |
| 18    | 24.401 | 24.275 | 24.475 | 1397061  | 5.05   | 394604   | 3.88    | 3.54  | V    |      |
| 19    | 24.594 | 24.475 | 24.650 | 674069   | 2.44   | 109132   | 1.07    | 6.17  | V    |      |
|       |        |        |        | 27676943 | 100.00 | 10172646 | 100.00  |       |      |      |

Library

<< Target >>

Line#:1 R.Time:3.083(Scan#:11) MassPeaks:246 BasePeak:46.00(39340)

RawMode:Averaged 3.075-3.092(10-12) BG Mode:Calc. from Peak

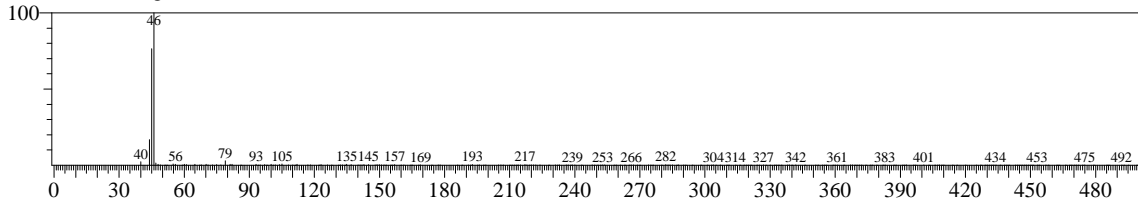

Hit#:1 Entry:52 Library:NIST05.LIB

SI:94 Formula:CH2O2 CAS:64-18-6 MolWeight:46 RetIndex:0

CompName:Formic acid \$\$ Methanoic acid \$\$ Aminic acid \$\$ Bilorin \$\$ Collo-Bueglatt \$\$ Collo-Didax \$\$ Formisoton \$\$ Formyl

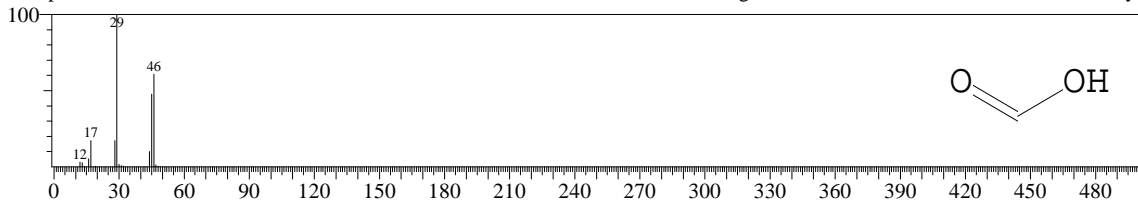

<< Target >>

Line#: 1 R.Time:3.083(Scan#:11) MassPeaks:246 BasePeak:46.00(39340)  
RawMode:Averaged 3.075-3.092(10-12) BG Mode:Calc. from Peak

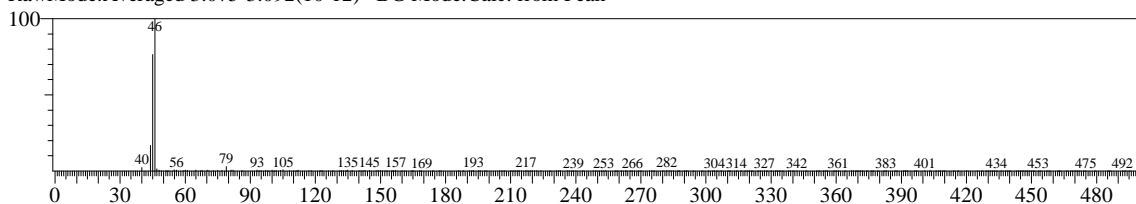

Hit#:2 Entry:41 Library:NIST05s.LIB

SI:93 Formula:CH2O2 CAS:64-18-6 MolWeight:46 RetIndex:0

CompName:Formic acid \$\$ Methanoic acid \$\$ Aminic acid \$\$ Bilorin \$\$ Collo-Bueglatt \$\$ Collo-Didax \$\$ Formisoton \$\$ Formyl

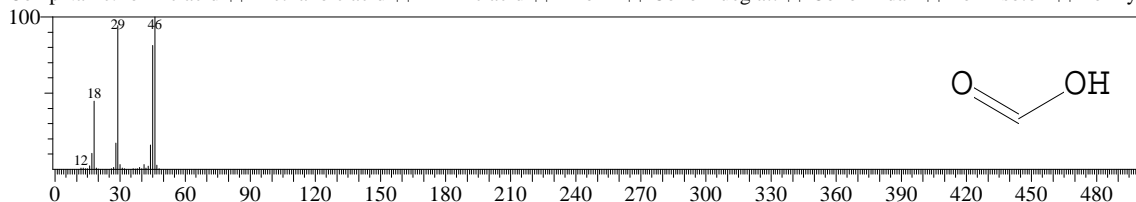

Hit#:3 Entry:42 Library:NIST05s.LIB

SI:92 Formula:CH2O2 CAS:64-18-6 MolWeight:46 RetIndex:0

CompName:Formic acid \$\$ Methanoic acid \$\$ Aminic acid \$\$ Bilorin \$\$ Collo-Bueglatt \$\$ Collo-Didax \$\$ Formisoton \$\$ Formyl

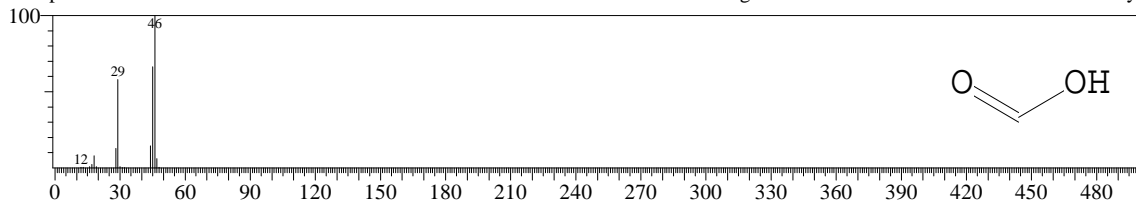

Hit#:4 Entry:55 Library:NIST05.LIB

SI:92 Formula:C2H3F CAS:75-2-5 MolWeight:46 RetIndex:183

CompName:Ethene, fluoro- \$\$ Ethylene, fluoro- \$\$ Fluoroethene \$\$ Fluoroethylene \$\$ Monofluoroethylene \$\$ Vinyl fluoride \$\$ C

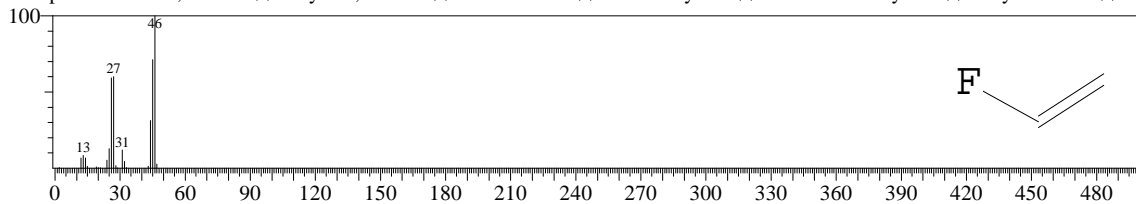

Hit#:5 Entry:53 Library:NIST05.LIB

SI:89 Formula:CH6N2 CAS:60-34-4 MolWeight:46 RetIndex:0

CompName:Hydrazine, methyl- \$\$ Methylhydrazine \$\$ Monomethylhydrazine \$\$ MMH \$\$ CH3NHNH2 \$\$ Hydrazomethane \$\$ 1

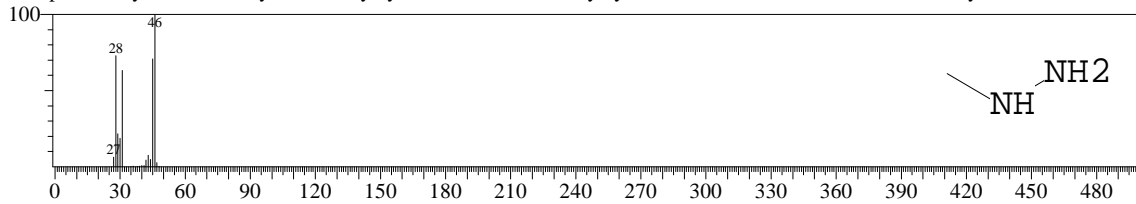

<< Target >>

Line#:2 R.Time:3.233(Scan#:29) MassPeaks:272 BasePeak:43.00(1013023)

RawMode:Averaged 3.225-3.242(28-30) BG Mode:Calc. from Peak

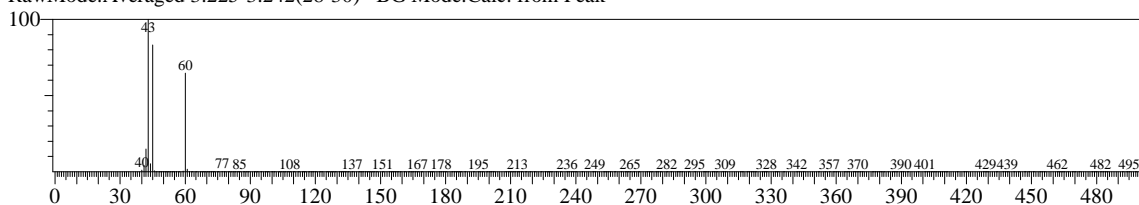

Hit#:1 Entry:133 Library:NIST05s.LIB

SI:98 Formula:C2H4O2 CAS:64-19-7 MolWeight:60 RetIndex:576

CompName:Acetic acid \$\$ Ethanoic acid \$\$ Ethylic acid \$\$ Glacial acetic acid \$\$ Methanecarboxylic acid \$\$ Vinegar acid \$\$ CH:

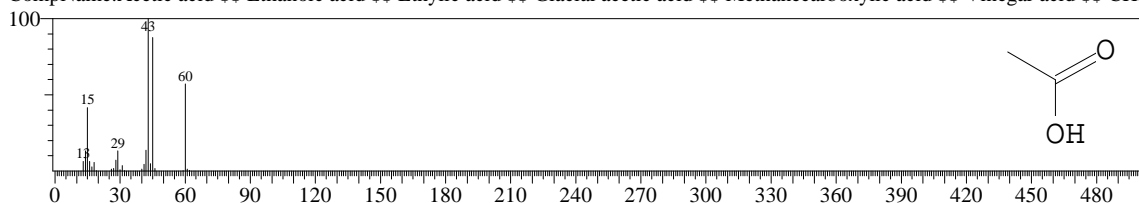

Hit#:2 Entry:134 Library:NIST05s.LIB

SI:98 Formula:C2H4O2 CAS:64-19-7 MolWeight:60 RetIndex:576

CompName:Acetic acid \$\$ Ethanoic acid \$\$ Ethylic acid \$\$ Glacial acetic acid \$\$ Methanecarboxylic acid \$\$ Vinegar acid \$\$ CH:

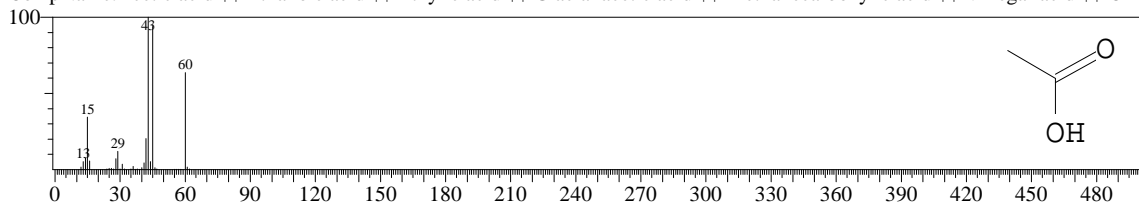

Hit#:3 Entry:455 Library:NIST05.LIB

SI:98 Formula:C2H7NO2 CAS:631-61-8 MolWeight:77 RetIndex:630

CompName:Ammonium acetate \$\$ Acetic acid, ammonium salt \$\$ Mindererus's spirit \$\$

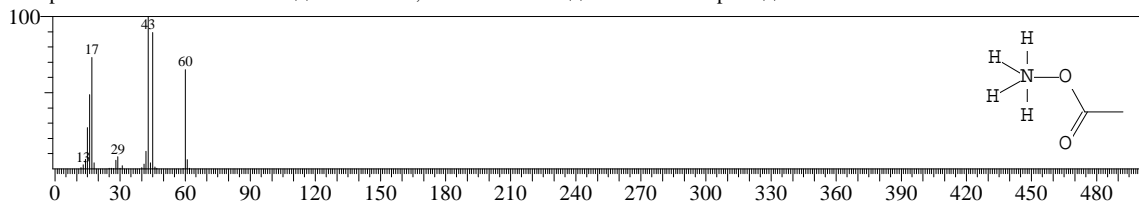

Hit#:4 Entry:136 Library:NIST05s.LIB

SI:98 Formula:C2H4O2 CAS:64-19-7 MolWeight:60 RetIndex:576

CompName:Acetic acid \$\$ Ethanoic acid \$\$ Ethylic acid \$\$ Glacial acetic acid \$\$ Methanecarboxylic acid \$\$ Vinegar acid \$\$ CH:

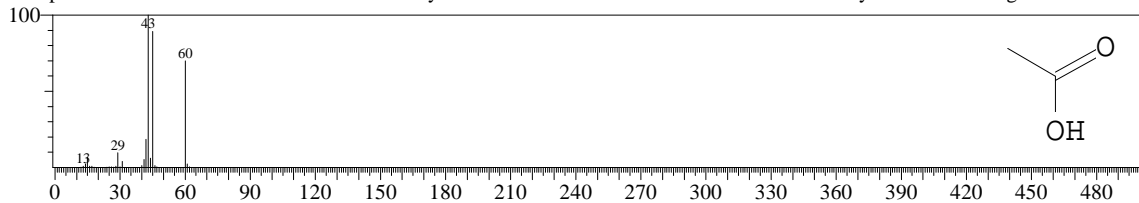

Hit#:5 Entry:133 Library:NIST05.LIB

SI:97 Formula:C2H4O2 CAS:64-19-7 MolWeight:60 RetIndex:576

CompName:Acetic acid \$\$ Ethanoic acid \$\$ Ethylic acid \$\$ Glacial acetic acid \$\$ Methanecarboxylic acid \$\$ Vinegar acid \$\$ CH:

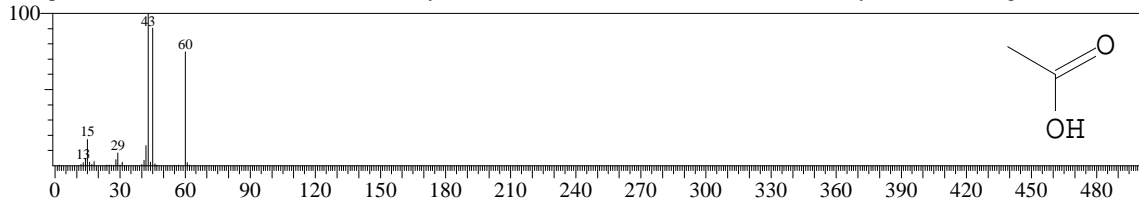

<< Target >>

Line#:3 R.Time:3.542(Scan#:66) MassPeaks:248 BasePeak:43.00(182256)  
RawMode:Averaged 3.533-3.550(65-67) BG Mode:Calc. from Peak

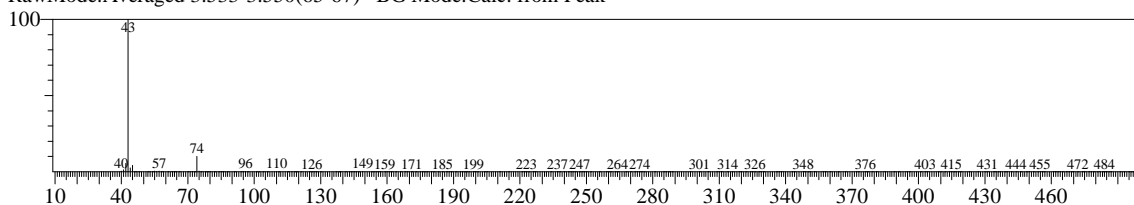

Hit#:1 Entry:415 Library:NIST05s.LIB

SI:98 Formula:C3H6O2 CAS:116-9-6 MolWeight:74 RetIndex:698

CompName:2-Propanone, 1-hydroxy- \$\$ Acetol \$\$ CH3C(O)CH2OH \$\$ Hydroxyacetone \$\$ Acetone alcohol \$\$ Acetylcarbinol \$\$

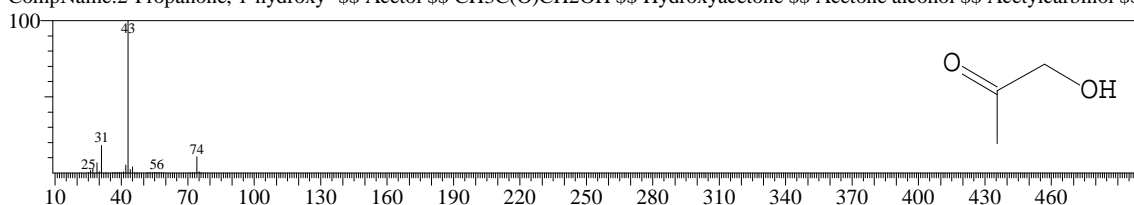

Hit#:2 Entry:368 Library:NIST05.LIB

SI:98 Formula:C3H6O2 CAS:116-9-6 MolWeight:74 RetIndex:698

CompName:2-Propanone, 1-hydroxy- \$\$ Acetol \$\$ CH3C(O)CH2OH \$\$ Hydroxyacetone \$\$ Acetone alcohol \$\$ Acetylcarbinol \$\$

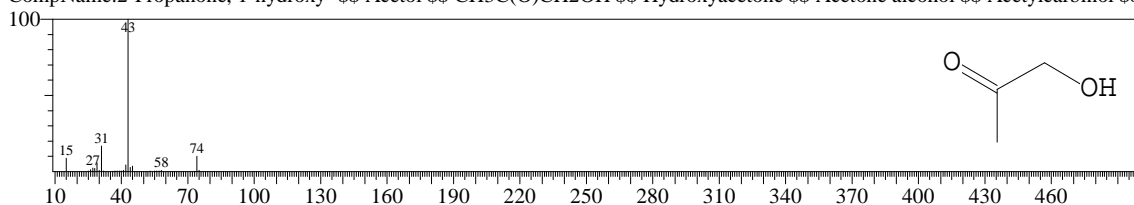

Hit#:3 Entry:414 Library:NIST05s.LIB

SI:96 Formula:C3H6O2 CAS:116-9-6 MolWeight:74 RetIndex:698

CompName:2-Propanone, 1-hydroxy- \$\$ Acetol \$\$ CH3C(O)CH2OH \$\$ Hydroxyacetone \$\$ Acetone alcohol \$\$ Acetylcarbinol \$\$

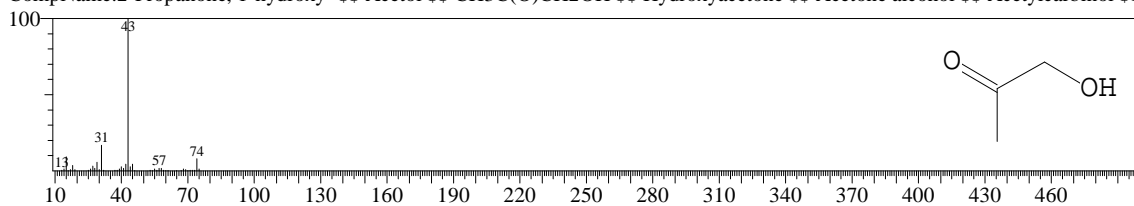

Hit#:4 Entry:369 Library:NIST05.LIB

SI:94 Formula:C3H6O2 CAS:79-20-9 MolWeight:74 RetIndex:487

CompName:Acetic acid, methyl ester \$\$ Methyl acetate \$\$ Devoton \$\$ Tereton \$\$ CH3COOCH3 \$\$ Methyl ethanoate \$\$ Acetate c

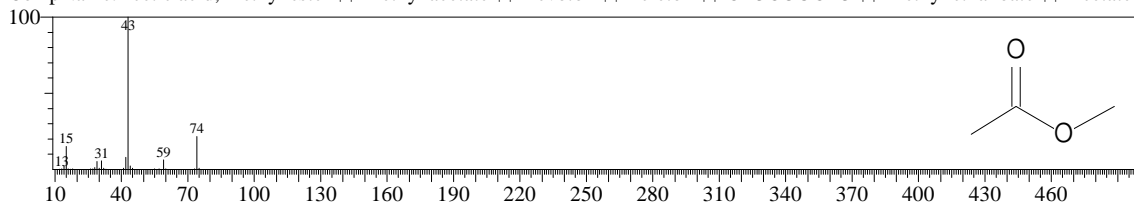

Hit#:5 Entry:4395 Library:NIST05.LIB

SI:93 Formula:C5H8O3 CAS:617-35-6 MolWeight:116 RetIndex:822

CompName:Propanoic acid, 2-oxo-, ethyl ester \$\$ Pyruvic acid, ethyl ester \$\$ Ethyl pyruvate \$\$ Ethyl 2-oxopropanoate \$\$ Ethyl 2-

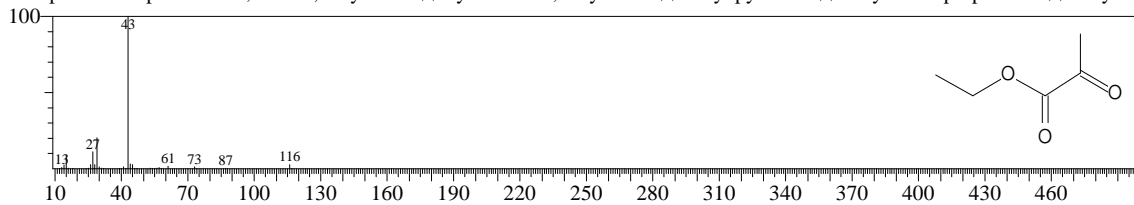

<< Target >>

Line#:4 R.Time:6.983(Scan#:479) MassPeaks:305 BasePeak:133.00(703371)

RawMode:Averaged 6.975-6.992(478-480) BG Mode:Calc. from Peak

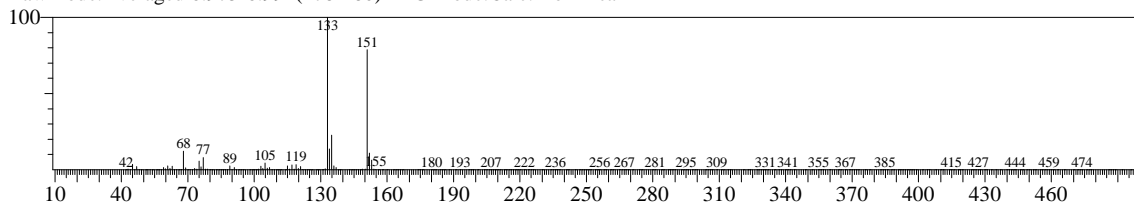

Hit#:1 Entry:15209 Library:NIST05.LIB

SI:85 Formula:C8H9NO2 CAS:0-0-0 MolWeight:151 RetIndex:1301

CompName:Oxime-, methoxy-phenyl\_

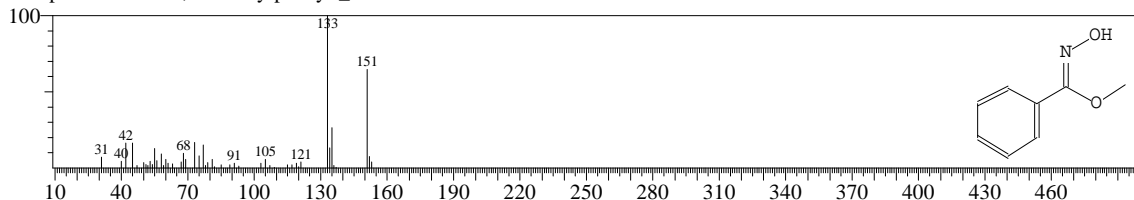

Hit#:2 Entry:15206 Library:NIST05.LIB

SI:79 Formula:C8H9NO2 CAS:2941-78-8 MolWeight:151 RetIndex:1575

CompName:2-Amino-5-methylbenzoic acid \$\$ 5-Methylantranilic acid \$\$ Benzoic acid, 2-amino-5-methyl- \$\$ m-Toluic acid, 6-a

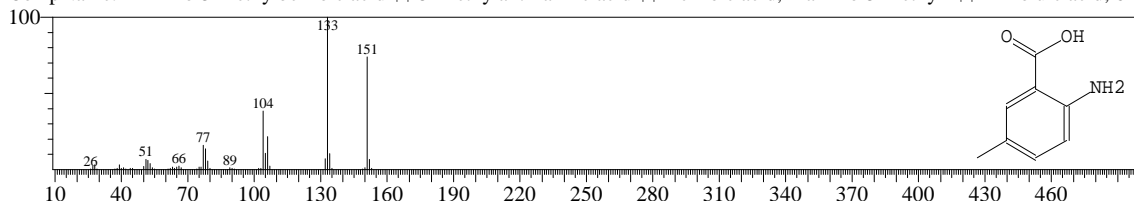

Hit#:3 Entry:51823 Library:NIST05.LIB

SI:79 Formula:C14H18O2 CAS:0-0-0 MolWeight:218 RetIndex:1714

CompName:4-Ethylbenzoic acid, cyclopentyl ester

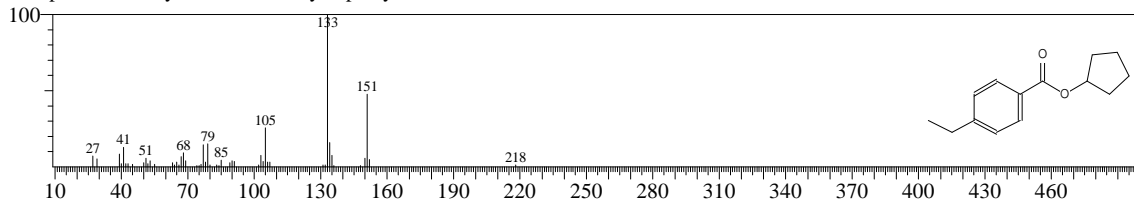

Hit#:4 Entry:61585 Library:NIST05.LIB

SI:78 Formula:C15H22O2 CAS:0-0-0 MolWeight:234 RetIndex:1770

CompName:4-Ethylbenzoic acid, hexyl ester

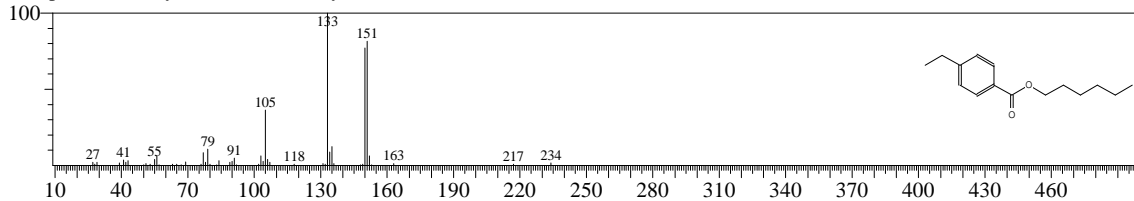

Hit#:5 Entry:15207 Library:NIST05.LIB

SI:76 Formula:C8H9NO2 CAS:2305-36-4 MolWeight:151 RetIndex:1575

CompName:Benzoic acid, 2-amino-4-methyl- \$\$ p-Toluic acid, 2-amino- \$\$ 2-Amino-4-methylbenzoic acid # \$\$

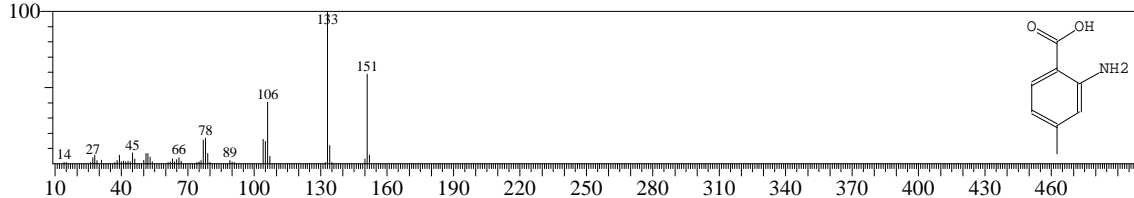

<< Target >>

Line#:5 R.Time:11.708(Scan#:1046) MassPeaks:229 BasePeak:43.00(19194)

RawMode:Averaged 11.700-11.717(1045-1047) BG Mode:Calc. from Peak

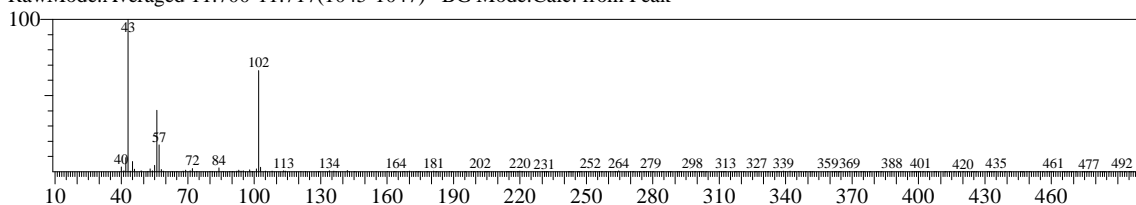

Hit#:1 Entry:3404 Library:NIST05s.LIB

SI:80 Formula:C5H8O3 CAS:123-76-2 MolWeight:116 RetIndex:1011

CompName:Penanoic acid, 4-oxo- \$\$ Levulinic acid \$\$ .beta.-Acetylpropionic acid \$\$ .gamma.-Ketovaleric acid \$\$ Laevulinic aci

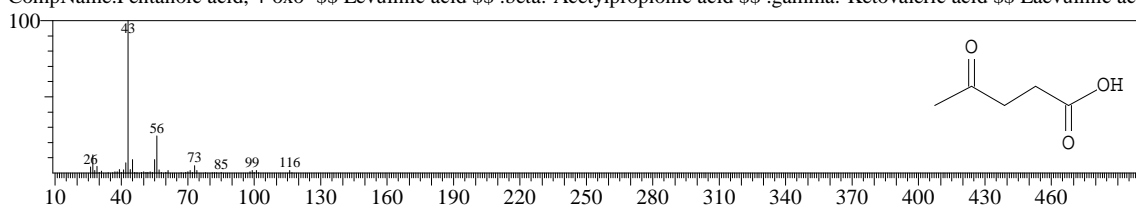

Hit#:2 Entry:4401 Library:NIST05.LIB

SI:80 Formula:C5H8O3 CAS:123-76-2 MolWeight:116 RetIndex:1011

CompName:Penanoic acid, 4-oxo- \$\$ Levulinic acid \$\$ .beta.-Acetylpropionic acid \$\$ .gamma.-Ketovaleric acid \$\$ Laevulinic aci

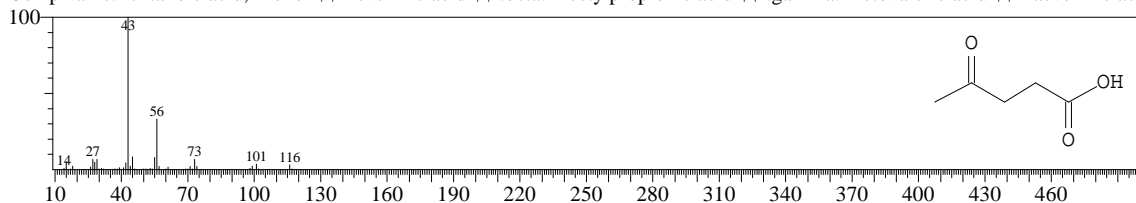

Hit#:3 Entry:2065 Library:NIST05.LIB

SI:80 Formula:C4H7NO2 CAS:1192-20-7 MolWeight:101 RetIndex:1030

CompName:Alpha-amino-gamma-butyrolactone \$\$ 3-Aminodihydro-2(3H)-furanone # \$\$

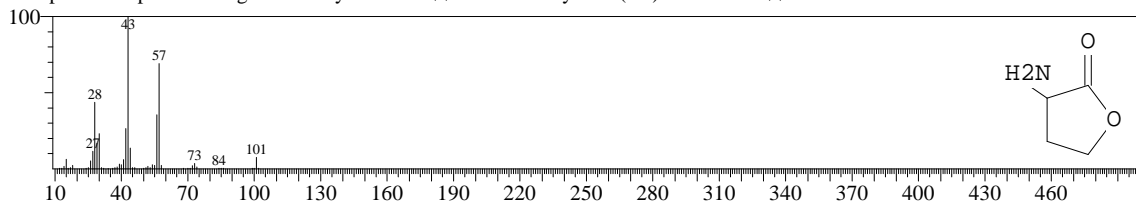

Hit#:4 Entry:3405 Library:NIST05s.LIB

SI:79 Formula:C5H8O3 CAS:123-76-2 MolWeight:116 RetIndex:1011

CompName:Penanoic acid, 4-oxo- \$\$ Levulinic acid \$\$ .beta.-Acetylpropionic acid \$\$ .gamma.-Ketovaleric acid \$\$ Laevulinic aci

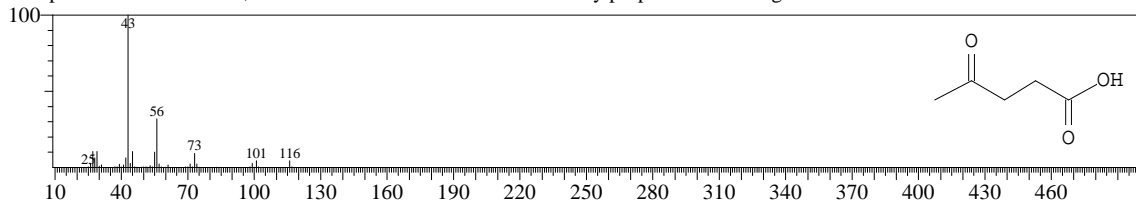

Hit#:5 Entry:2172 Library:NIST05.LIB

SI:79 Formula:C4H6O3 CAS:600-22-6 MolWeight:102 RetIndex:722

CompName:Propanoic acid, 2-oxo-, methyl ester \$\$ Pyruvic acid, methyl ester \$\$ Methyl pyruvate \$\$ Methylglyoxylic acid methyl

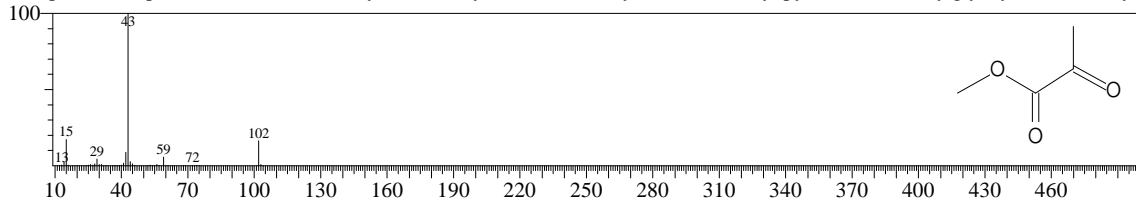

<< Target >>

Line#:6 R.Time:11.842(Scan#:1062) MassPeaks:233 BasePeak:43.00(75804)

RawMode:Averaged 11.833-11.850(1061-1063) BG Mode:Calc. from Peak

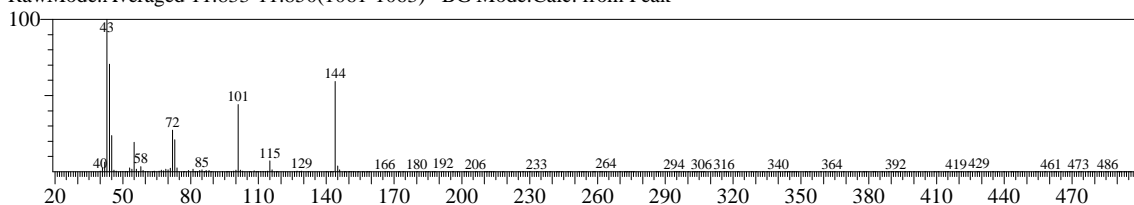

Hit#:1 Entry:7403 Library:NIST05s.LIB

SI:96 Formula:C6H8O4 CAS:28564-83-2 MolWeight:144 RetIndex:1269

CompName:4H-Pyran-4-one, 2,3-dihydro-3,5-dihydroxy-6-methyl- \$ 3,5-Dihydroxy-6-methyl-2,3-dihydro-4H-pyran-4-one # \$\$

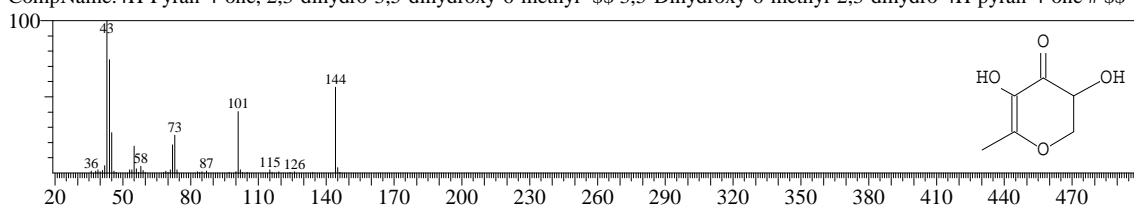

Hit#:2 Entry:12367 Library:NIST05.LIB

SI:92 Formula:C6H8O4 CAS:28564-83-2 MolWeight:144 RetIndex:1269

CompName:4H-Pyran-4-one, 2,3-dihydro-3,5-dihydroxy-6-methyl- \$ 3,5-Dihydroxy-6-methyl-2,3-dihydro-4H-pyran-4-one # \$\$

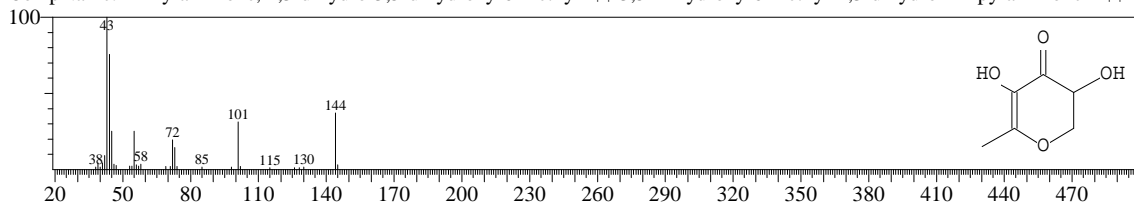

Hit#:3 Entry:4455 Library:NIST05.LIB

SI:82 Formula:C6H12O2 CAS:3299-32-9 MolWeight:116 RetIndex:761

CompName:1,3-Dioxolane, 2,4,5-trimethyl- \$ 2,4,5-Trimethyl-1,3-dioxolane # \$\$

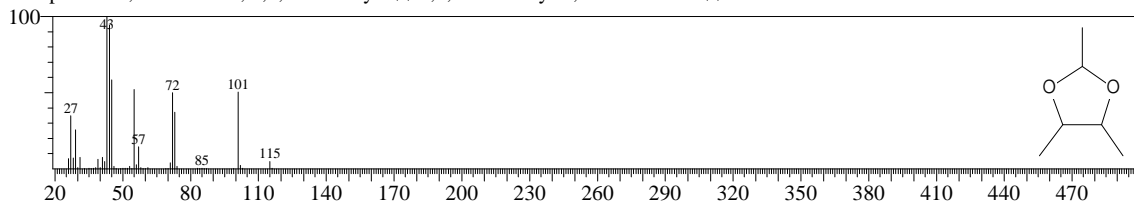

Hit#:4 Entry:12371 Library:NIST05.LIB

SI:80 Formula:C6H8O4 CAS:10230-62-3 MolWeight:144 RetIndex:1173

CompName:2,4-Dihydroxy-2,5-dimethyl-3(2H)-furan-3-one \$ 2,4-Dihydroxy-2,5-dimethyl-3(2H)-furanone # \$\$

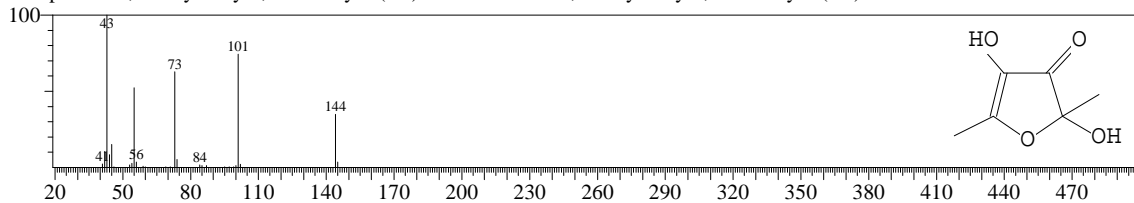

Hit#:5 Entry:12589 Library:NIST05.LIB

SI:78 Formula:C8H16O2 CAS:0-0-0 MolWeight:144 RetIndex:1156

CompName:2-Propyl-tetrahydropyran-3-ol

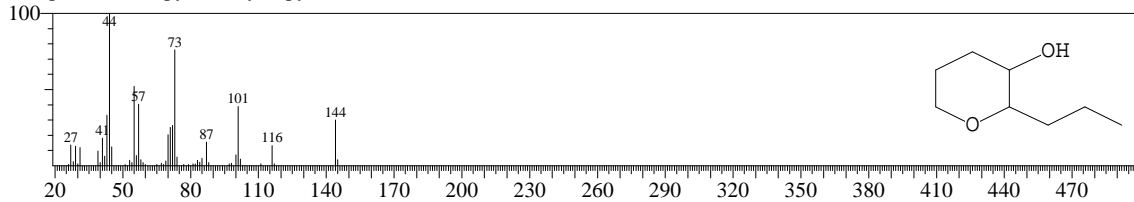

<< Target >>

Line#:7 R.Time:12.942(Scan#:1194) MassPeaks:251 BasePeak:71.95(19975)

RawMode:Averaged 12.933-12.950(1193-1195) BG Mode:Calc. from Peak

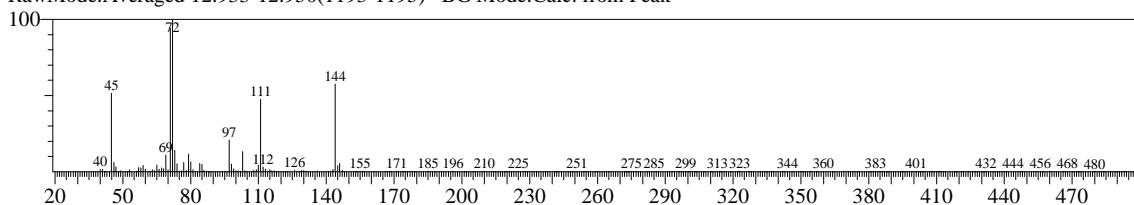

Hit#:1 Entry:12396 Library:NIST05.LIB

SI:93 Formula:C6H8S2 CAS:62488-53-3 MolWeight:144 RetIndex:1134

CompName:3-Vinyl-1,2-dithiacyclohex-5-ene \$ 3-Vinyl-3,4-dihydro-1,2-dithiine # \$ \$

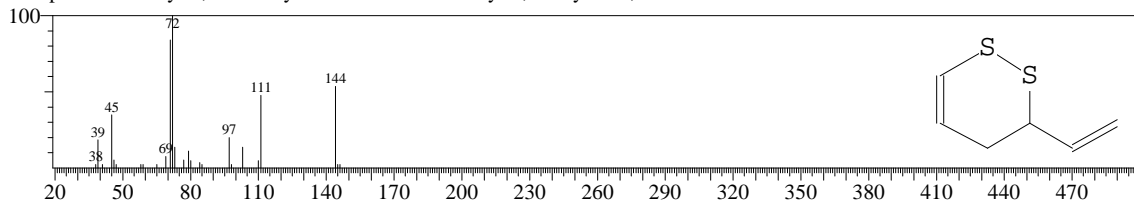

Hit#:2 Entry:12397 Library:NIST05.LIB

SI:75 Formula:C6H8S2 CAS:62488-52-2 MolWeight:144 RetIndex:1134

CompName:3-Vinyl-1,2-dithiacyclohex-4-ene \$ 3-Vinyl-3,6-dihydro-1,2-dithiine # \$ \$

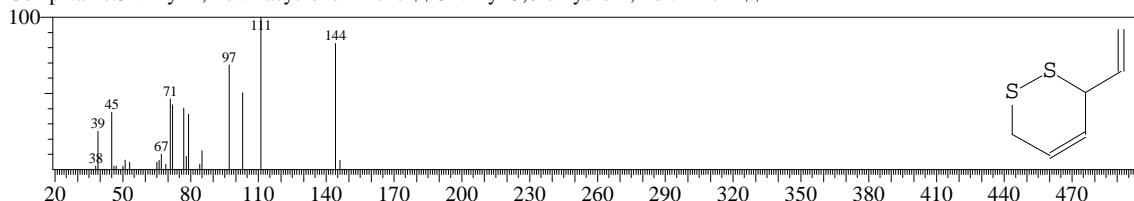

Hit#:3 Entry:12639 Library:NIST05.LIB

SI:71 Formula:C8H16O2 CAS:29887-60-3 MolWeight:144 RetIndex:993

CompName:Cyclohexane, 1,2-dimethoxy-, trans- \$ trans-1,2-Dimethoxycyclohexane \$ \$ 1,2-Dimethoxycyclohexane # \$ \$

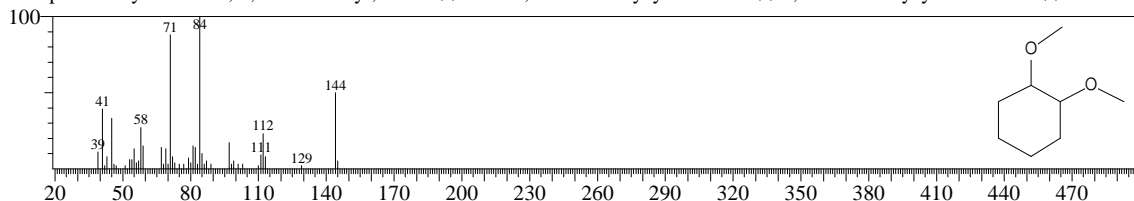

Hit#:4 Entry:12638 Library:NIST05.LIB

SI:70 Formula:C8H16O2 CAS:30363-80-5 MolWeight:144 RetIndex:993

CompName:Cyclohexane, 1,2-dimethoxy-, cis- \$ cis-1,2-Dimethoxycyclohexane \$ \$ 1,2-Dimethoxycyclohexane # \$ \$

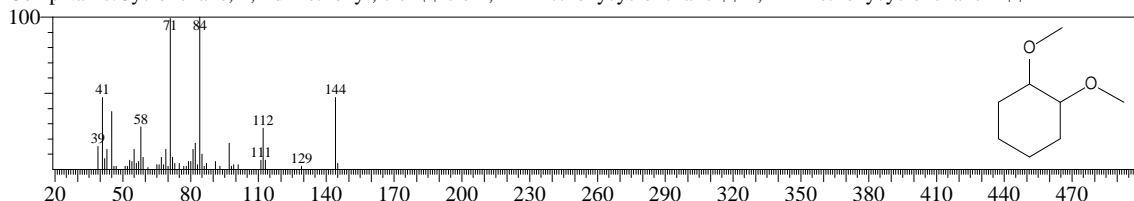

Hit#:5 Entry:3409 Library:NIST05.LIB

SI:70 Formula:C6H8S CAS:89533-93-7 MolWeight:112 RetIndex:894

CompName:Sulfide,1-propenyl 1-propynyl \$ (E)-1-(1-Propynylsulfanyl)-1-propene # \$ \$

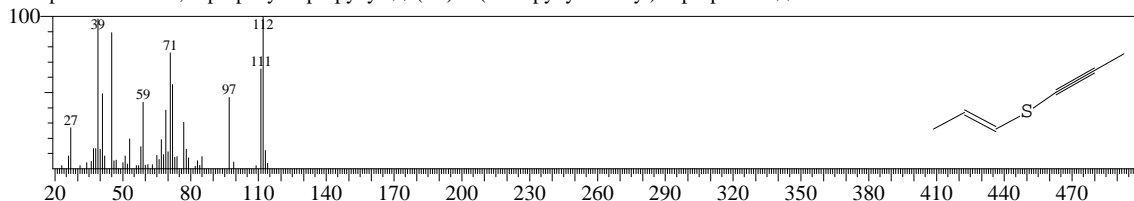



<< Target >>

Line#:8 R.Time:14.425(Scan#:1372) MassPeaks:241 BasePeak:41.00(14100)  
RawMode:Averaged 14.417-14.433(1371-1373) BG Mode:Calc. from Peak

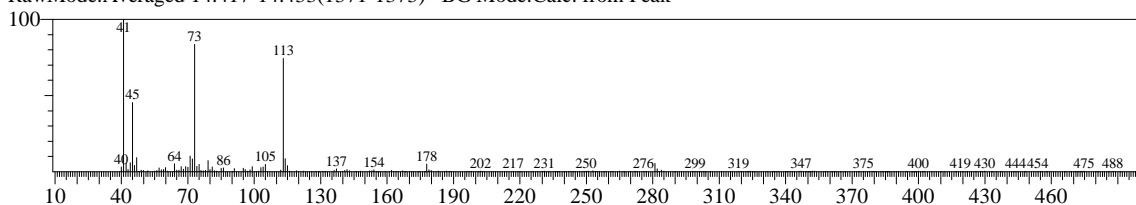

Hit#:1 Entry:28371 Library:NIST05.LIB  
SI:91 Formula:C6H10S3 CAS:2050-87-5 MolWeight:178 RetIndex:1350  
CompName:Trisulfide, di-2-propenyl \$\$ Allyl trisulfide \$\$ Diallyl trisulfide \$\$ 1,3-Diallyltrisulfane # \$\$

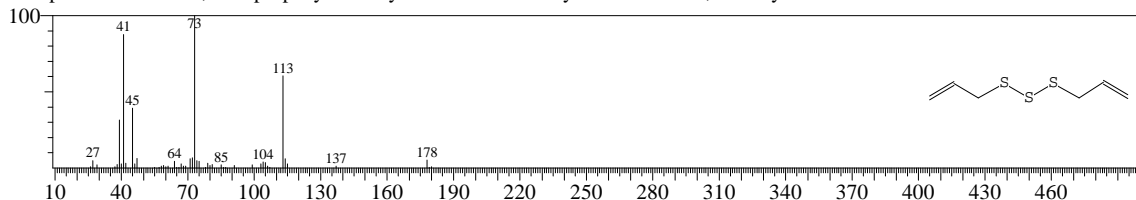

Hit#:2 Entry:12960 Library:NIST05s.LIB  
SI:87 Formula:C6H10S3 CAS:2050-87-5 MolWeight:178 RetIndex:1350  
CompName:Trisulfide, di-2-propenyl \$\$ Allyl trisulfide \$\$ Diallyl trisulfide \$\$ 1,3-Diallyltrisulfane # \$\$

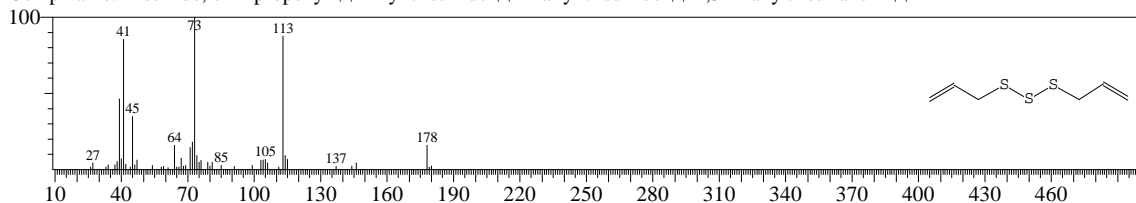

Hit#:3 Entry:3712 Library:NIST05.LIB  
SI:84 Formula:C5H7NS CAS:105643-80-9 MolWeight:113 RetIndex:1004  
CompName:2-Propenylthioacetone nitrile \$\$ 2-Propenylthioacetone nitrile \$\$ (Allylsulfanyl)acetonitrile # \$\$

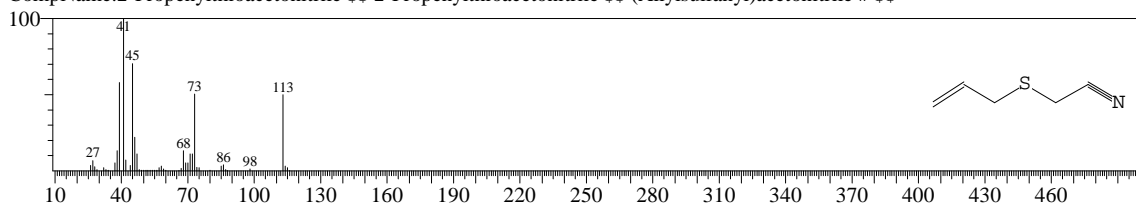

Hit#:4 Entry:13170 Library:NIST05.LIB  
SI:77 Formula:C6H10S2 CAS:2179-57-9 MolWeight:146 RetIndex:1099  
CompName:Diallyl disulphide \$\$ Allyl disulfide \$\$ Diallyl disulfide \$\$ Disulfide, di-2-propenyl \$\$ Allyl disulphide \$\$ 4,5-Dithia-

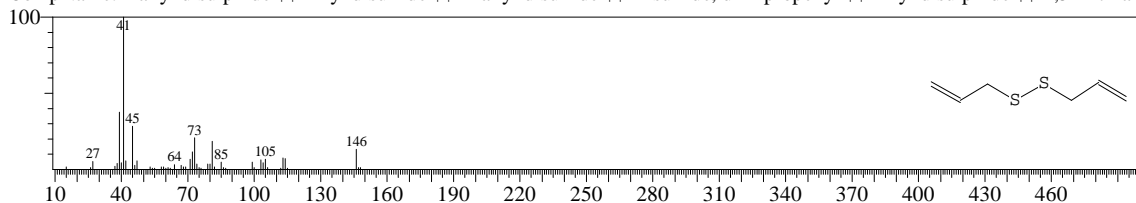

Hit#:5 Entry:3168 Library:NIST05s.LIB  
SI:76 Formula:C6H10S CAS:592-88-1 MolWeight:114 RetIndex:849  
CompName:1-Propene, 3,3'-thiobis- \$\$ Allyl sulfide \$\$ Allyl monosulfide \$\$ Diallyl monosulfide \$\$ Diallyl sulfide \$\$ Diallyl thio-

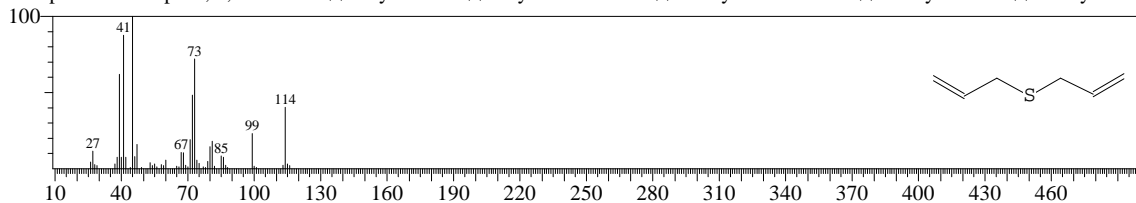

<< Target >>

Line#:9 R.Time:15.925(Scan#:1552) MassPeaks:258 BasePeak:57.00(5047)

RawMode:Averaged 15.917-15.933(1551-1553) BG Mode:Calc. from Peak

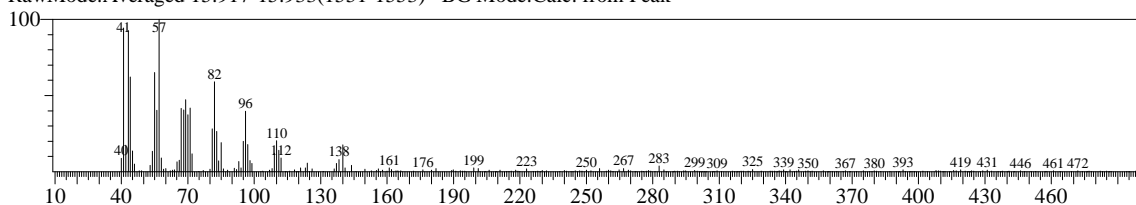

Hit#:1 Entry:14087 Library:NIST05s.LIB

SI:93 Formula:C12H24O CAS:112-54-9 MolWeight:184 RetIndex:1402

CompName:Dodecanal \$ n-Lauraldehyde \$ n-Dodecanal \$ n-Dodecyl aldehyde \$ n-Dodecyl aldehyde \$ n-Lauraldehyde \$ Al

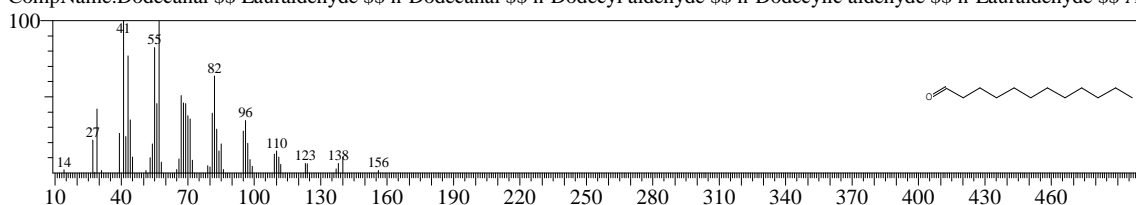

Hit#:2 Entry:14089 Library:NIST05s.LIB

SI:93 Formula:C12H24O CAS:112-54-9 MolWeight:184 RetIndex:1402

CompName:Dodecanal \$ n-Lauraldehyde \$ n-Dodecanal \$ n-Dodecyl aldehyde \$ n-Dodecyl aldehyde \$ n-Lauraldehyde \$ Al

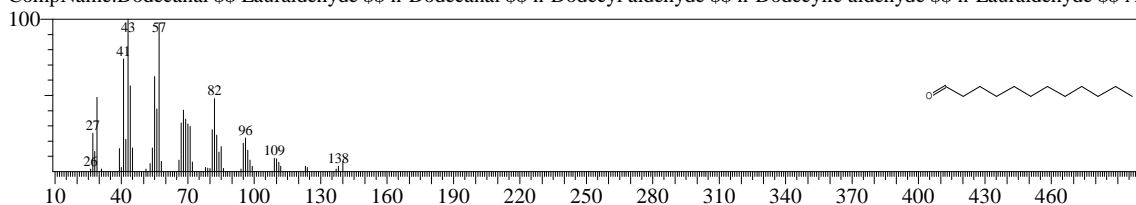

Hit#:3 Entry:17684 Library:NIST05s.LIB

SI:92 Formula:C14H28O CAS:124-25-4 MolWeight:212 RetIndex:1601

CompName:Tetradecanal \$ Myristaldehyde \$ Myristylaldehyde \$ Tetradecylaldehyde \$ n-Tetradecanal \$ Aldehyde C-14 \$ A

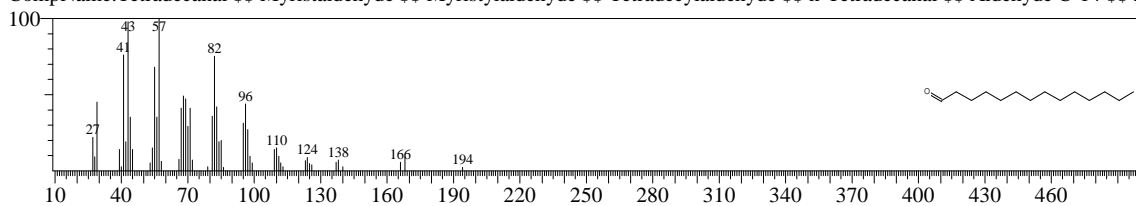

Hit#:4 Entry:17683 Library:NIST05s.LIB

SI:91 Formula:C14H28O CAS:124-25-4 MolWeight:212 RetIndex:1601

CompName:Tetradecanal \$ Myristaldehyde \$ Myristylaldehyde \$ Tetradecylaldehyde \$ n-Tetradecanal \$ Aldehyde C-14 \$ A

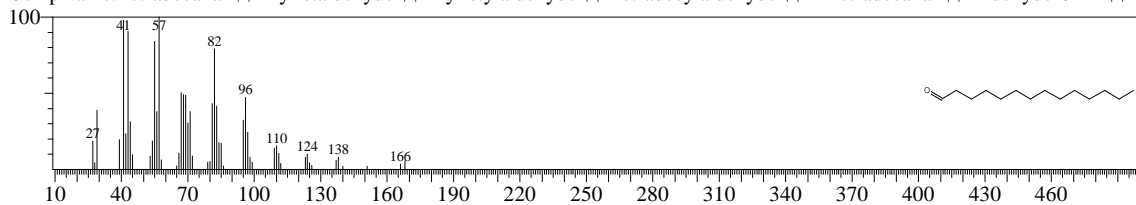

Hit#:5 Entry:40204 Library:NIST05s.LIB

SI:91 Formula:C13H26O CAS:10486-19-8 MolWeight:198 RetIndex:1502

CompName:Tridecanal \$ n-Tridecylaldehyde \$ Tridecanaldehyde \$ Tridecyl aldehyde \$ 1-Tridecanal \$ Tridecane aldehyde \$ A

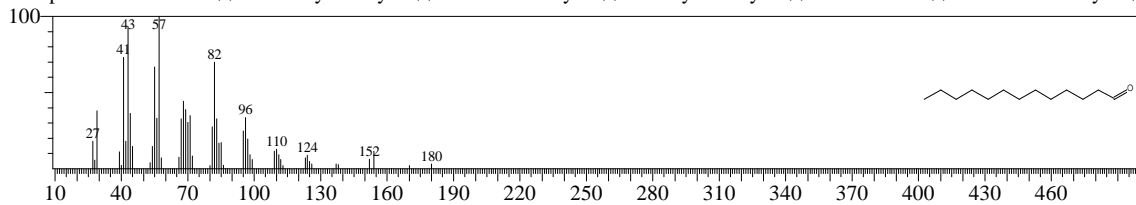

<< Target >>

Line#:10 R.Time:16.625(Scan#:1636) MassPeaks:304 BasePeak:57.00(110691)

RawMode:Averaged 16.617-16.633(1635-1637) BG Mode:Calc. from Peak

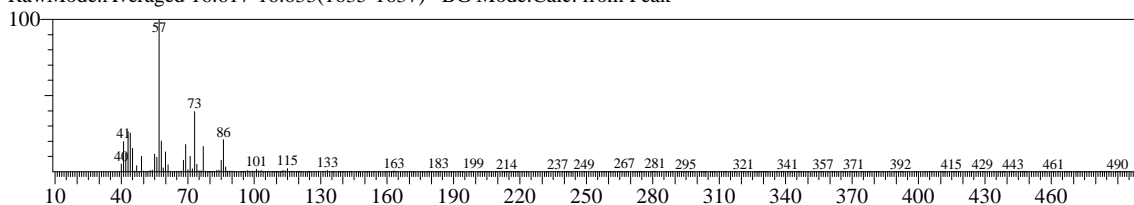

Hit#:1 Entry:123174 Library:NIST05.LIB

SI:83 Formula:C12H22O11 CAS:57-50-1 MolWeight:342 RetIndex:3139

CompName:Sucrose \$.alpha.-D-Glucopyranoside, .beta.-D-fructofuranosyl \$.beta.-D-Fructofuranosyl .alpha.-D-glucopyranoside

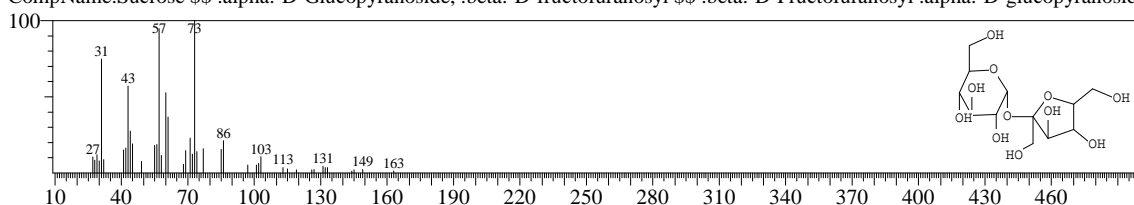

Hit#:2 Entry:8563 Library:NIST05s.LIB

SI:82 Formula:C4H9NO5 CAS:126-11-4 MolWeight:151 RetIndex:1444

CompName:1,3-Propanediol, 2-(hydroxymethyl)-2-nitro- \$\$ Isobutylglycerol, nitro- \$\$ Methane, trimethylolnitro- \$\$ Nitroisobutylg

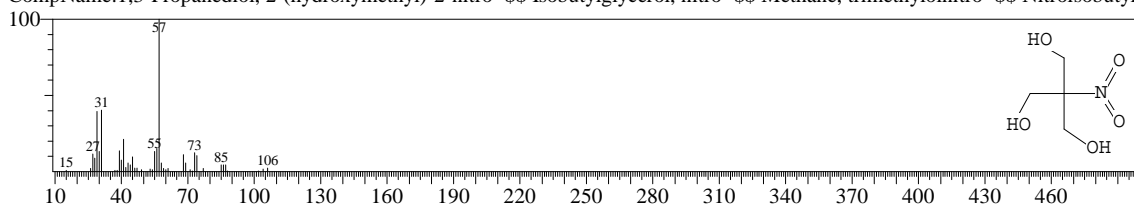

Hit#:3 Entry:5797 Library:NIST05s.LIB

SI:82 Formula:C6H14O3 CAS:77-99-6 MolWeight:134 RetIndex:1261

CompName:1,3-Propanediol, 2-ethyl-2-(hydroxymethyl)- \$\$ Ethriol \$\$ Ethyltrimethylolmethane \$\$ Etriol \$\$ Etriol \$\$ Hexaglyceri

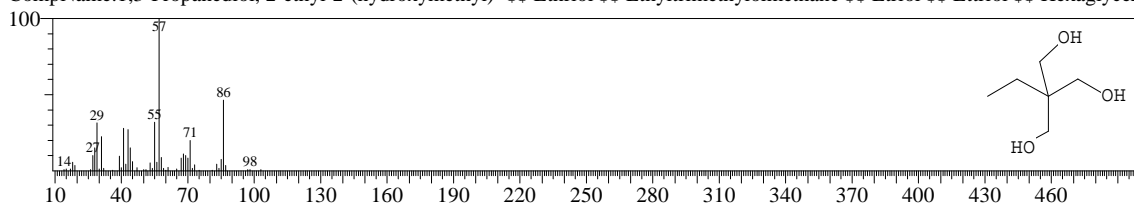

Hit#:4 Entry:15081 Library:NIST05.LIB

SI:81 Formula:C4H9NO5 CAS:126-11-4 MolWeight:151 RetIndex:1444

CompName:1,3-Propanediol, 2-(hydroxymethyl)-2-nitro- \$\$ Isobutylglycerol, nitro- \$\$ Methane, trimethylolnitro- \$\$ Nitroisobutylg

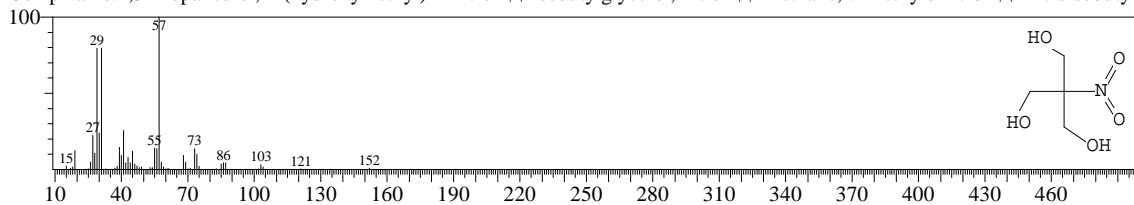

Hit#:5 Entry:1952 Library:NIST05s.LIB

SI:80 Formula:C4H6O3 CAS:108-32-7 MolWeight:102 RetIndex:875

CompName:Propylene Carbonate \$\$ 1,3-Dioxolan-2-one, 4-methyl- \$\$ Carbonic acid, cyclic propylene ester \$\$ Cyclic methylethylc

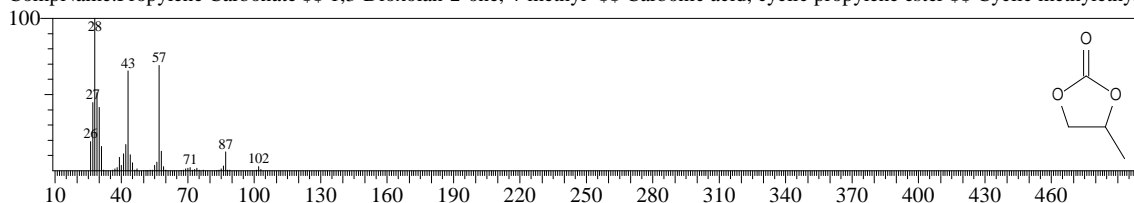

<< Target >>

Line#:11 R.Time:16.825(Scan#:1660) MassPeaks:261 BasePeak:41.00(4409)  
RawMode:Averaged 16.817-16.833(1659-1661) BG Mode:Calc. from Peak

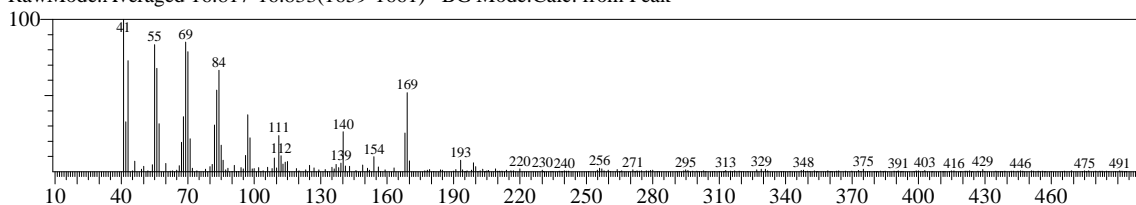

Hit#:1 Entry:23837 Library:NIST05.LIB  
SI:86 Formula:C12H24 CAS:294-62-2 MolWeight:168 RetIndex:1439  
CompName:Cyclododecane

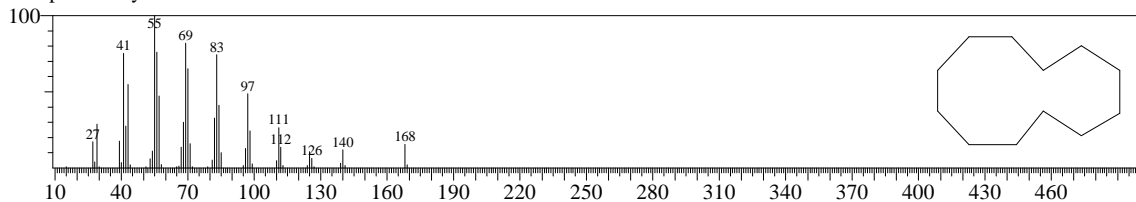

Hit#:2 Entry:11686 Library:NIST05s.LIB  
SI:86 Formula:C12H24 CAS:294-62-2 MolWeight:168 RetIndex:1439  
CompName:Cyclododecane

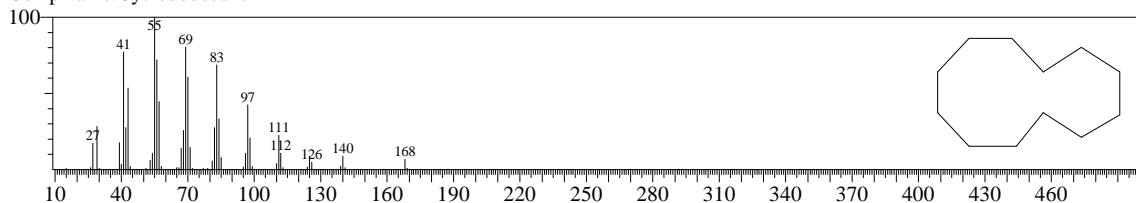

Hit#:3 Entry:14421 Library:NIST05s.LIB  
SI:86 Formula:C12H26O CAS:112-53-8 MolWeight:186 RetIndex:1457  
CompName:1-Dodecanol \$Dodecyl alcohol \$n-Dodecan-1-ol \$n-Dodecanol \$n-Dodecyl alcohol \$Alcohol C-12 \$Alfol 1

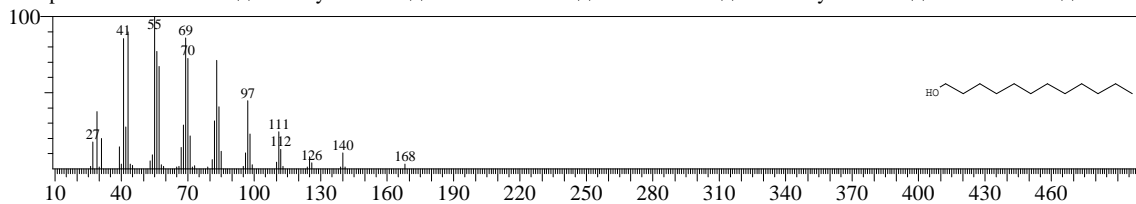

Hit#:4 Entry:33451 Library:NIST05.LIB  
SI:85 Formula:C12H26O CAS:112-53-8 MolWeight:186 RetIndex:1457  
CompName:1-Dodecanol \$Dodecyl alcohol \$n-Dodecan-1-ol \$n-Dodecanol \$n-Dodecyl alcohol \$Alcohol C-12 \$Alfol 1

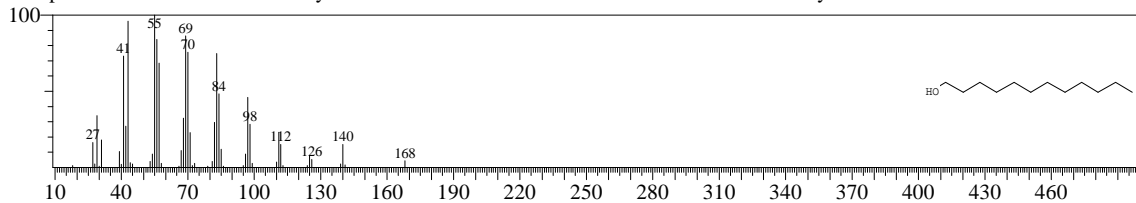

Hit#:5 Entry:17937 Library:NIST05s.LIB  
SI:85 Formula:C14H30O CAS:112-72-1 MolWeight:214 RetIndex:1656  
CompName:1-Tetradecanol \$n-Tetradecan-1-ol \$n-Tetradecanol \$n-Tetradecyl alcohol \$Alfol 14 \$Lanette K \$Lanette W

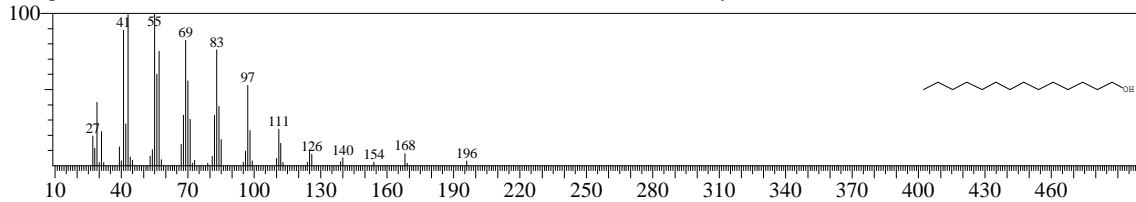

<< Target >>

Line#:12 R.Time:18.825(Scan#:1900) MassPeaks:248 BasePeak:170.05(12842)

RawMode:Averaged 18.817-18.833(1899-1901) BG Mode:Calc. from Peak

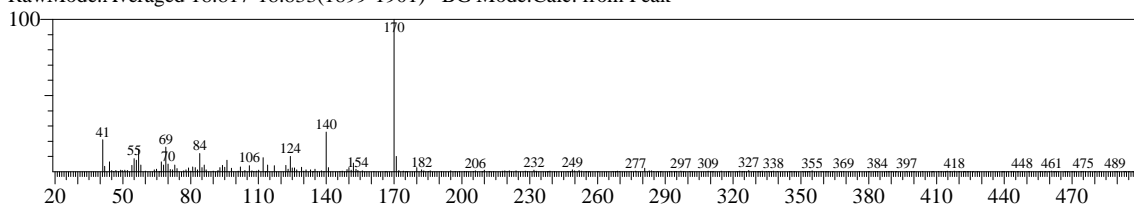

Hit#:1 Entry:139920 Library:NIST05.LIB

SI:74 Formula:C22H41NO4 CAS:0-0-0 MolWeight:383 RetIndex:2603

CompName:l-Isoleucine, N-allyloxycarbonyl-, dodecyl ester

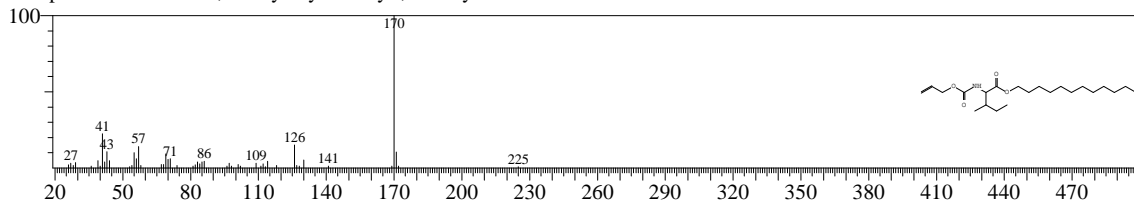

Hit#:2 Entry:115885 Library:NIST05.LIB

SI:73 Formula:C18H33NO4 CAS:0-0-0 MolWeight:327 RetIndex:2205

CompName:l-Isoleucine, N-allyloxycarbonyl-, octyl ester

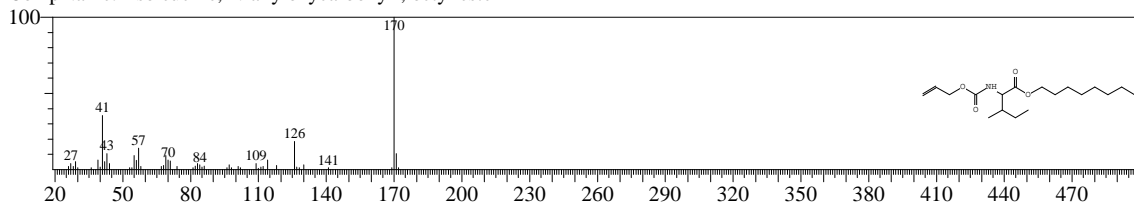

Hit#:3 Entry:66855 Library:NIST05.LIB

SI:73 Formula:C12H21NO4 CAS:0-0-0 MolWeight:243 RetIndex:1609

CompName:l-Isoleucine, N-allyloxycarbonyl-, ethyl ester

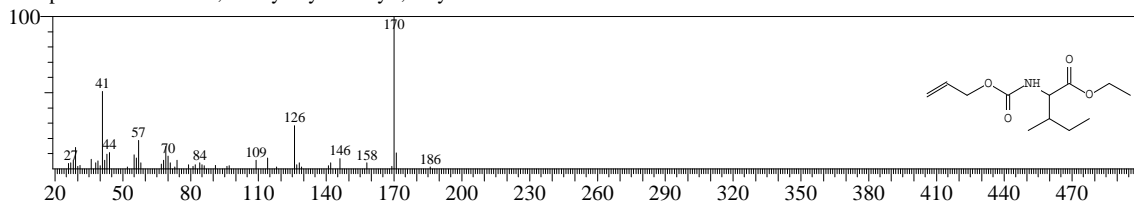

Hit#:4 Entry:32702 Library:NIST05.LIB

SI:73 Formula:C11H23NO CAS:16140-62-8 MolWeight:185 RetIndex:1496

CompName:3-(5-Ethyl-2-methylpiperidino)-1-propanol \$\$ 3-(5-Ethyl-2-methyl-1-piperidinyl)-1-propanol # \$\$

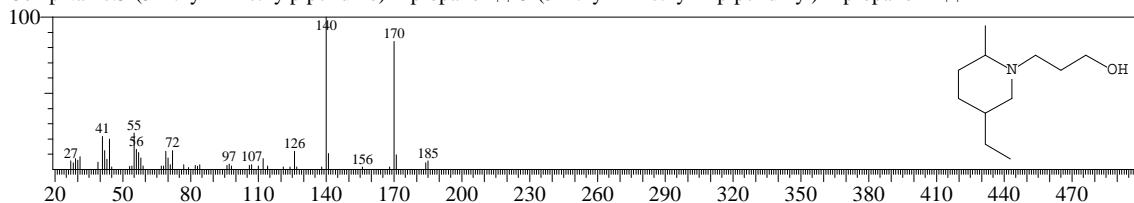

Hit#:5 Entry:56783 Library:NIST05.LIB

SI:73 Formula:C12H22N2O2 CAS:1436-27-7 MolWeight:226 RetIndex:1636

CompName:2,5-Piperazinedione, 3,6-bis(2-methylpropyl)- \$\$ 3,6-Diisobutyl-2,5-piperazinedione # \$\$

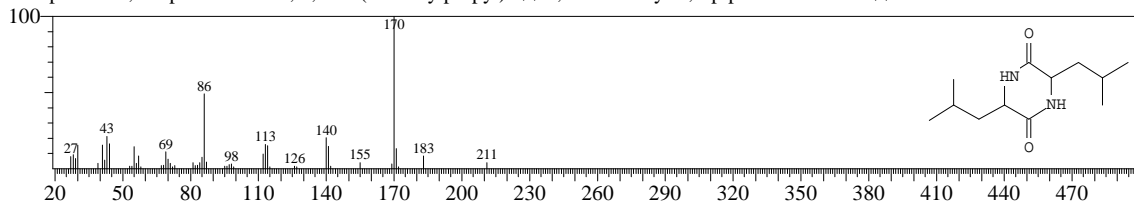

<< Target >>

Line#:13 R.Time:19.525(Scan#:1984) MassPeaks:255 BasePeak:144.00(58611)  
RawMode:Averaged 19.517-19.533(1983-1985) BG Mode:Calc. from Peak

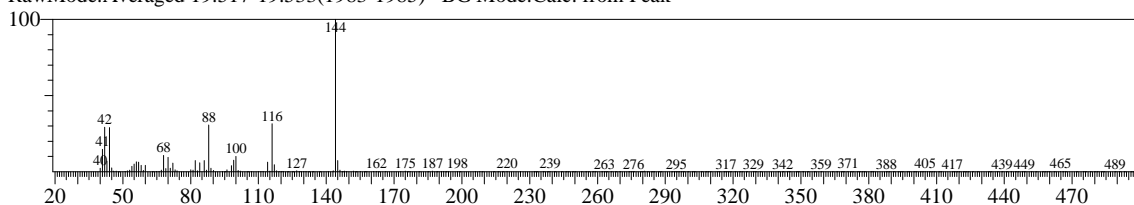

Hit#:1 Entry:67958 Library:NIST05.LIB  
SI:81 Formula:C12H23NO4 CAS:0-0-0 MolWeight:245 RetIndex:1619  
CompName:l-Alanine, N-butoxycarbonyl-, isobutyl ester

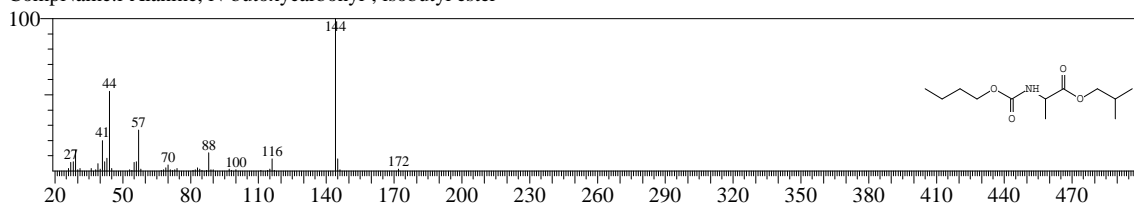

Hit#:2 Entry:109550 Library:NIST05.LIB  
SI:81 Formula:C17H33NO4 CAS:0-0-0 MolWeight:315 RetIndex:2180  
CompName:l-Alanine, N-butoxycarbonyl-, nonyl ester

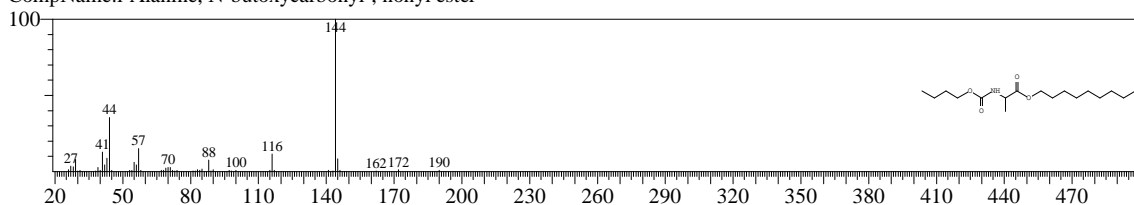

Hit#:3 Entry:93408 Library:NIST05.LIB  
SI:81 Formula:C15H29NO4 CAS:0-0-0 MolWeight:287 RetIndex:1981  
CompName:l-Alanine, N-butoxycarbonyl-, heptyl ester

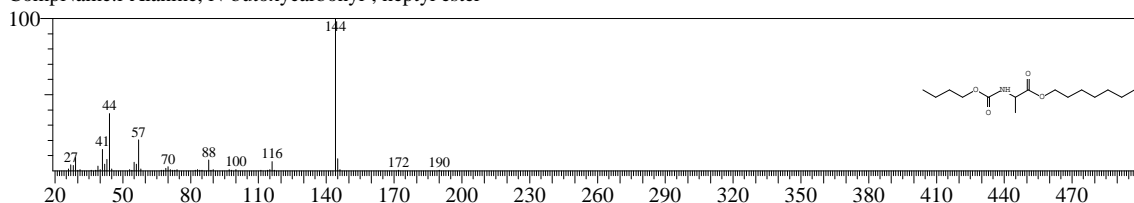

Hit#:4 Entry:34681 Library:NIST05.LIB  
SI:81 Formula:C10H23NO2 CAS:0-0-0 MolWeight:189 RetIndex:1389  
CompName:Butanamine, N,N-bis(2-hydroxypropyl)-

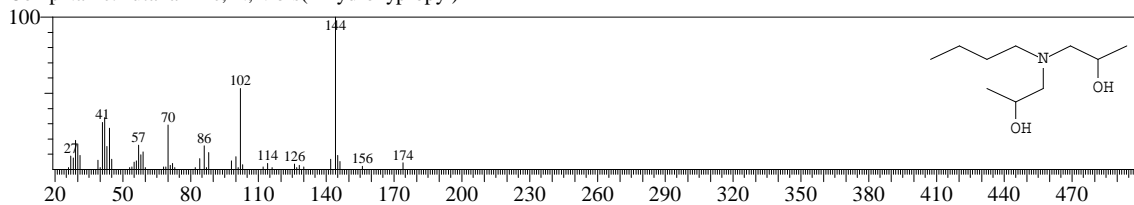

Hit#:5 Entry:76475 Library:NIST05.LIB  
SI:80 Formula:C13H25NO4 CAS:0-0-0 MolWeight:259 RetIndex:1782  
CompName:l-Alanine, N-butoxycarbonyl-, pentyl ester

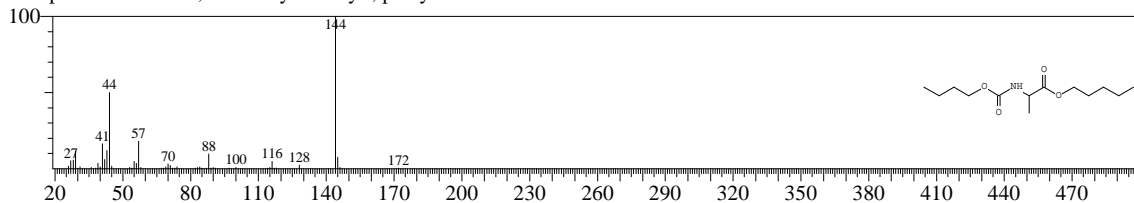

<< Target >>

Line#:14 R.Time:20.383(Scan#:2087) MassPeaks:275 BasePeak:73.00(9342)  
RawMode:Averaged 20.375-20.392(2086-2088) BG Mode:Calc. from Peak

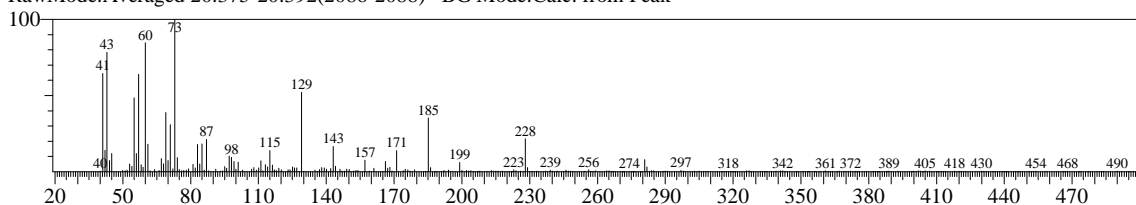

Hit#:1 Entry:19252 Library:NIST05s.LIB  
SI:94 Formula:C14H28O2 CAS:544-63-8 MolWeight:228 RetIndex:1769  
CompName:Tetradecanoic acid \$\$ Myristic acid \$\$ n-Tetradecanoic acid \$\$ n-Tetradecic acid \$\$ Neo-Fat 14 \$\$ Univol U 316S \$

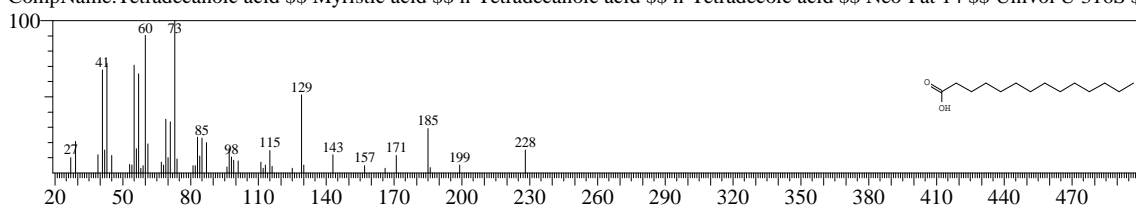

Hit#:2 Entry:19251 Library:NIST05s.LIB  
SI:92 Formula:C14H28O2 CAS:544-63-8 MolWeight:228 RetIndex:1769  
CompName:Tetradecanoic acid \$\$ Myristic acid \$\$ n-Tetradecanoic acid \$\$ n-Tetradecic acid \$\$ Neo-Fat 14 \$\$ Univol U 316S \$

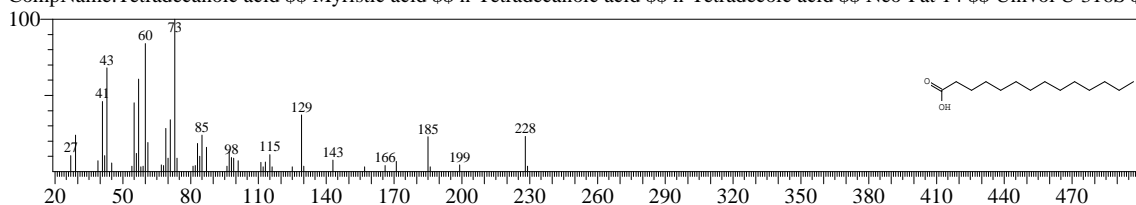

Hit#:3 Entry:58280 Library:NIST05.LIB  
SI:92 Formula:C14H28O2 CAS:544-63-8 MolWeight:228 RetIndex:1769  
CompName:Tetradecanoic acid \$\$ Myristic acid \$\$ n-Tetradecanoic acid \$\$ n-Tetradecic acid \$\$ Neo-Fat 14 \$\$ Univol U 316S \$

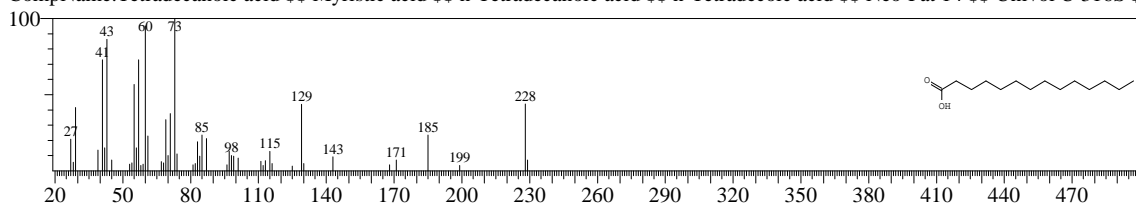

Hit#:4 Entry:19250 Library:NIST05s.LIB  
SI:92 Formula:C14H28O2 CAS:544-63-8 MolWeight:228 RetIndex:1769  
CompName:Tetradecanoic acid \$\$ Myristic acid \$\$ n-Tetradecanoic acid \$\$ n-Tetradecic acid \$\$ Neo-Fat 14 \$\$ Univol U 316S \$

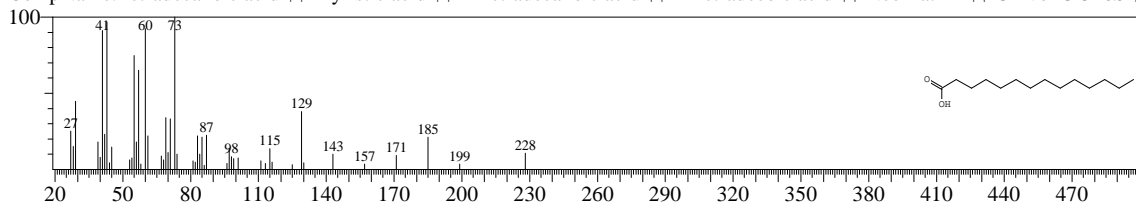

Hit#:5 Entry:17905 Library:NIST05s.LIB  
SI:90 Formula:C13H26O2 CAS:638-53-9 MolWeight:214 RetIndex:1670  
CompName:Tridecanoic acid \$\$ n-Tridecanoic acid \$\$ n-Tridecoic acid \$\$ Tridecylic acid \$\$

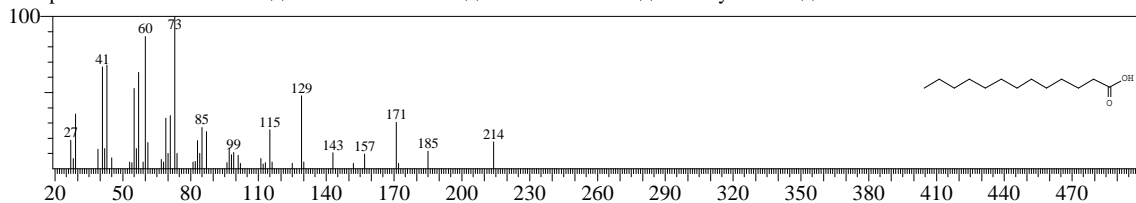

<< Target >>

Line#:15 R.Time:21.358(Scan#:2204) MassPeaks:269 BasePeak:69.00(10380)

RawMode:Averaged 21.350-21.367(2203-2205) BG Mode:Calc. from Peak

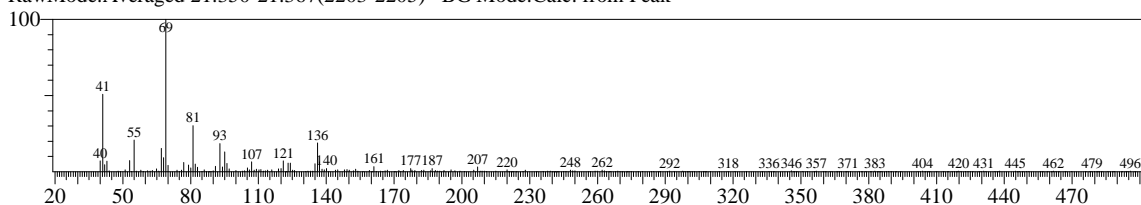

Hit#:1 Entry:70128 Library:NIST05.LIB

SI:92 Formula:C17H28O CAS:66408-55-7 MolWeight:248 RetIndex:1855

CompName:4,8,12-Tetradecatrienal, 5,9,13-trimethyl- \$\$ (4E,8E)-5,9,13-Trimethyl-4,8,12-tetradecatrienal # \$\$

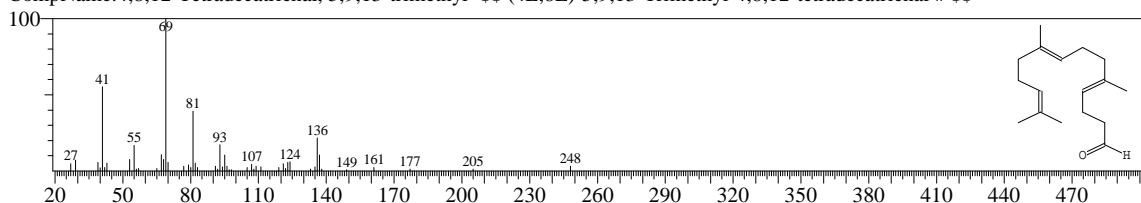

Hit#:2 Entry:141461 Library:NIST05.LIB

SI:88 Formula:C21H28N2O5 CAS:0-0-0 MolWeight:388 RetIndex:3007

CompName:1-(3,5-Dinitrophenoxy)-3,7,11-trimethyl-dodeca-2,6,10-triene

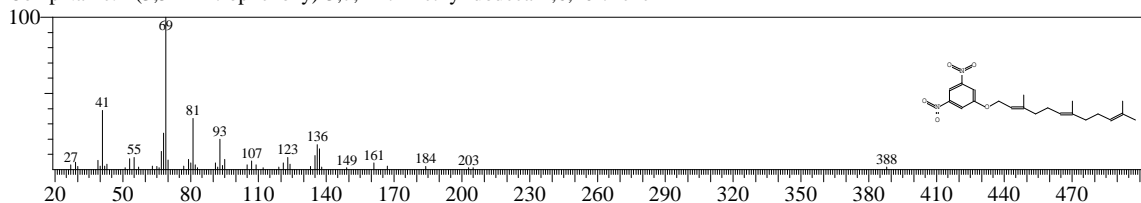

Hit#:3 Entry:18658 Library:NIST05s.LIB

SI:87 Formula:C15H26O CAS:106-28-5 MolWeight:222 RetIndex:1710

CompName:2,6,10-Dodecatrien-1-ol, 3,7,11-trimethyl-, (E,E)- \$\$ (E,E)-Farnesol \$\$ (2E,6E)-Farnesol \$\$ All-trans-Farnesol \$\$ trans

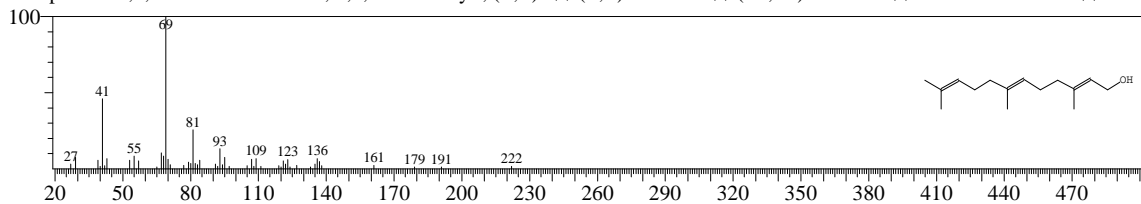

Hit#:4 Entry:110355 Library:NIST05.LIB

SI:87 Formula:C22H36O CAS:56882-9-8 MolWeight:316 RetIndex:2337

CompName:4,9,13,17-Tetramethyl-4,8,12,16-octadecatetraenal \$\$ (4E,8E,12E)-4,9,13,17-Tetramethyl-4,8,12,16-octadecatetraenal

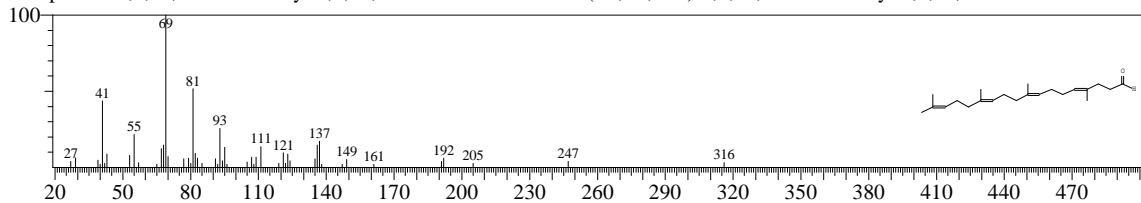

Hit#:5 Entry:54489 Library:NIST05.LIB

SI:87 Formula:C15H26O CAS:0-0-0 MolWeight:222 RetIndex:1710

CompName:Farnesol isomer a

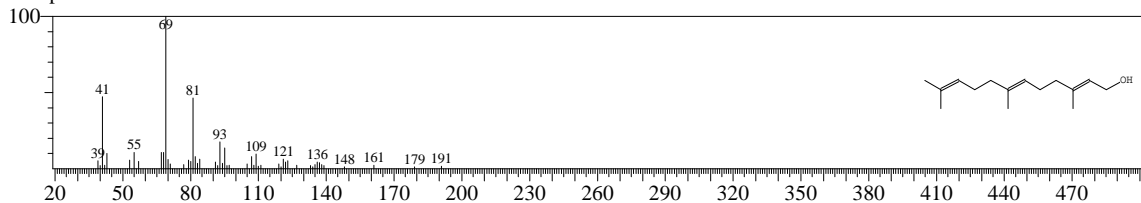



<< Target >>

Line#:16 R.Time:22.217(Scan#:2307) MassPeaks:281 BasePeak:74.00(14218)

RawMode:Averaged 22.208-22.225(2306-2308) BG Mode:Calc. from Peak

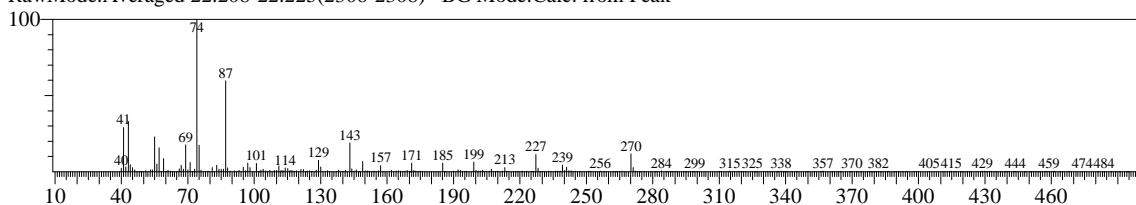

Hit#:1 Entry:83491 Library:NIST05.LIB

SI:93 Formula:C17H34O2 CAS:112-39-0 MolWeight:270 RetIndex:1878

CompName:Hexadecanoic acid, methyl ester \$ \$ Palmitic acid, methyl ester \$ \$ n-Hexadecanoic acid methyl ester \$ \$ Metholene 221

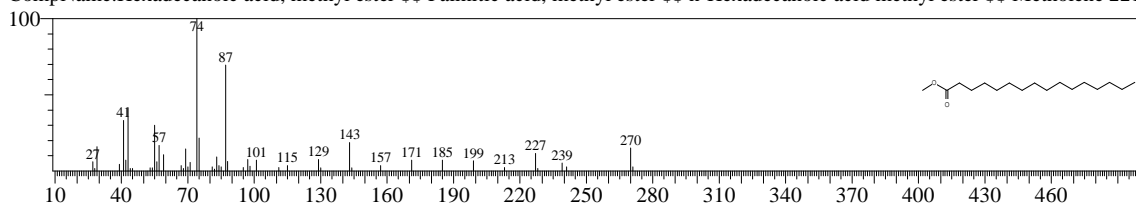

Hit#:2 Entry:22219 Library:NIST05s.LIB

SI:92 Formula:C17H34O2 CAS:112-39-0 MolWeight:270 RetIndex:1878

CompName:Hexadecanoic acid, methyl ester \$ \$ Palmitic acid, methyl ester \$ \$ n-Hexadecanoic acid methyl ester \$ \$ Metholene 221

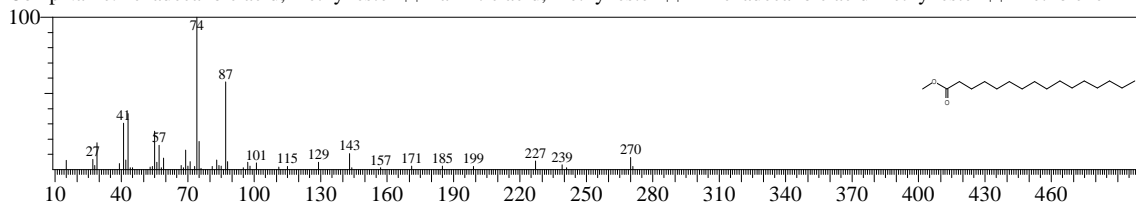

Hit#:3 Entry:22220 Library:NIST05s.LIB

SI:91 Formula:C17H34O2 CAS:112-39-0 MolWeight:270 RetIndex:1878

CompName:Hexadecanoic acid, methyl ester \$ \$ Palmitic acid, methyl ester \$ \$ n-Hexadecanoic acid methyl ester \$ \$ Metholene 221

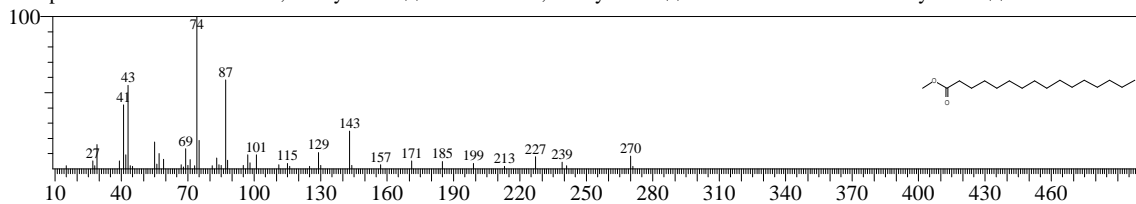

Hit#:4 Entry:22222 Library:NIST05s.LIB

SI:90 Formula:C17H34O2 CAS:5129-60-2 MolWeight:270 RetIndex:1814

CompName:Heptadecanoic acid, 14-methyl-, methyl ester \$ \$ Methyl 14-methylheptadecanoate # \$ \$

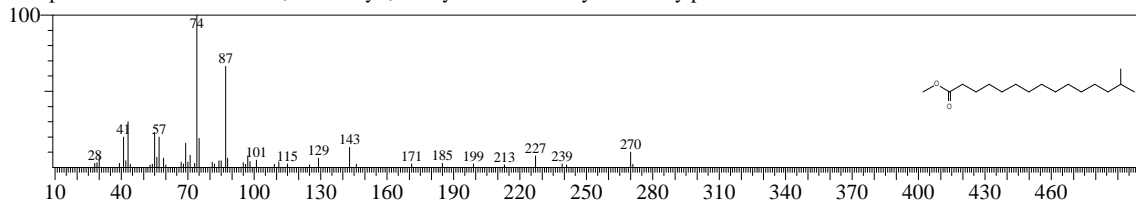

Hit#:5 Entry:83493 Library:NIST05.LIB

SI:90 Formula:C17H34O2 CAS:5129-60-2 MolWeight:270 RetIndex:1814

CompName:Heptadecanoic acid, 14-methyl-, methyl ester \$ \$ Methyl 14-methylheptadecanoate # \$ \$

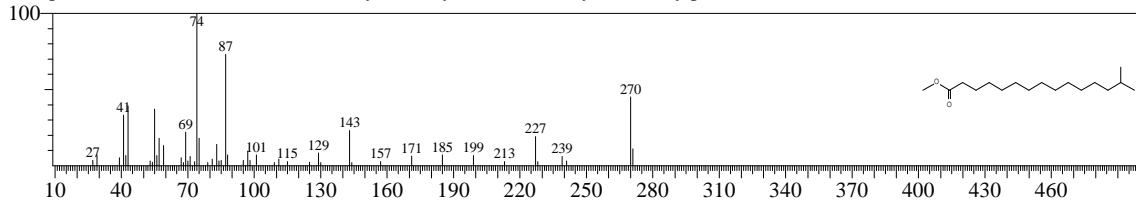

<< Target >>

Line#:17 R.Time:22.392(Scan#:2328) MassPeaks:288 BasePeak:41.00(8607)  
RawMode:Averaged 22.383-22.400(2327-2329) BG Mode:Calc. from Peak

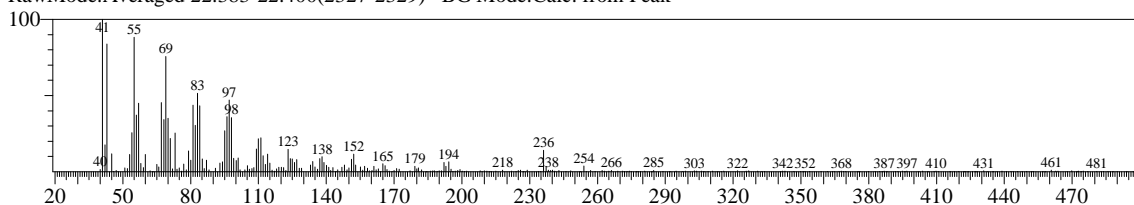

Hit#:1 Entry:90568 Library:NIST05.LIB  
SI:92 Formula:C18H34O2 CAS:593-39-5 MolWeight:282 RetIndex:2175  
CompName:6-Octadecenoic acid, (Z)- \$\$ (6Z)-6-Octadecenoic acid # \$\$

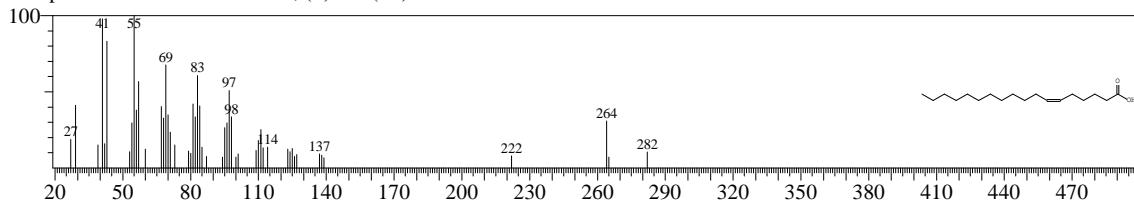

Hit#:2 Entry:65295 Library:NIST05.LIB  
SI:92 Formula:C15H28O2 CAS:4727-18-8 MolWeight:240 RetIndex:2158  
CompName:Cyclopentadecanone, 2-hydroxy- \$\$ 2-Hydroxycyclopentadecanone # \$\$

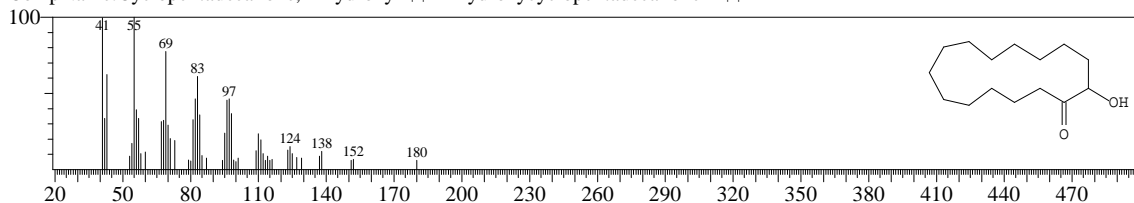

Hit#:3 Entry:90577 Library:NIST05.LIB  
SI:91 Formula:C18H34O2 CAS:112-80-1 MolWeight:282 RetIndex:2175  
CompName:Oleic Acid \$\$ 9-Octadecenoic acid (Z)- \$\$ .delta.(Sup9)-cis-Oleic acid \$\$ cis-C

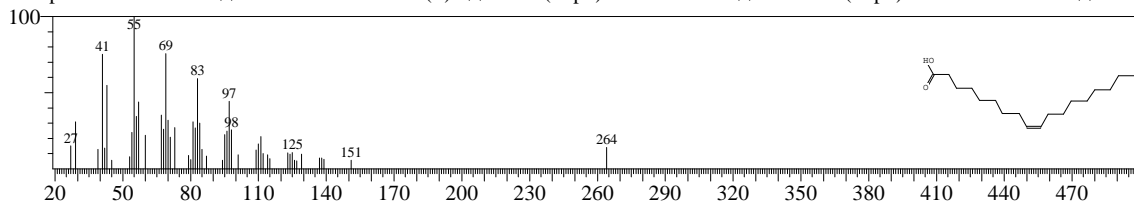

Hit#:4 Entry:73680 Library:NIST05.LIB  
SI:89 Formula:C16H30O2 CAS:0-0-0 MolWeight:254 RetIndex:1976  
CompName:Z-7-Hexadecenoic acid

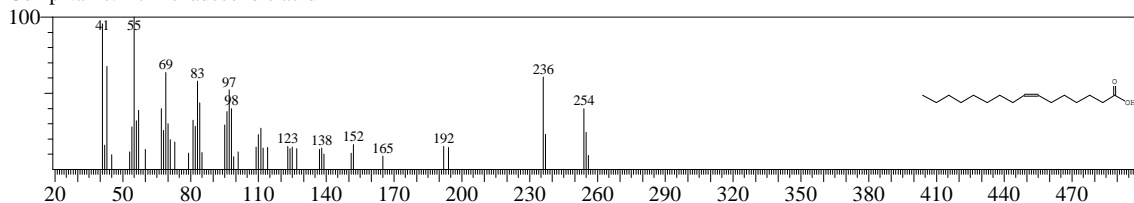

Hit#:5 Entry:73685 Library:NIST05.LIB  
SI:89 Formula:C16H30O2 CAS:2091-29-4 MolWeight:254 RetIndex:1976  
CompName:9-Hexadecenoic acid \$\$ (9E)-9-Hexadecenoic acid # \$\$

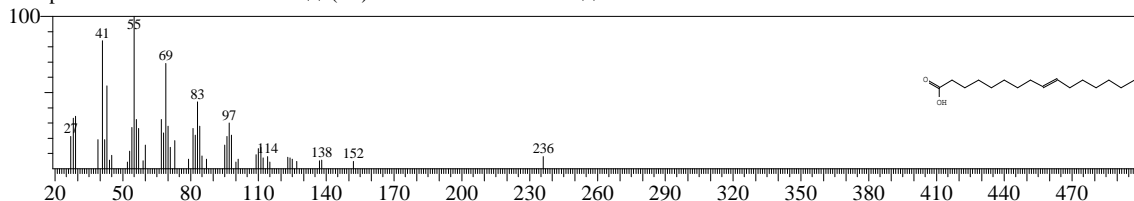

<< Target >>

Line#:18 R.Time:22.583(Scan#:2351) MassPeaks:308 BasePeak:43.05(45726)

RawMode:Averaged 22.575-22.592(2350-2352) BG Mode:Calc. from Peak

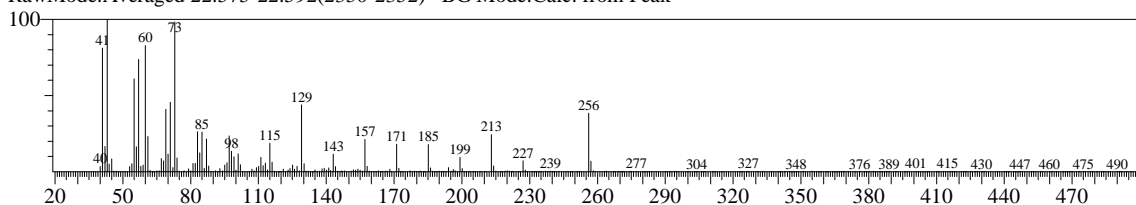

Hit#:1 Entry:21331 Library:NIST05s.LIB

SI:95 Formula:C16H32O2 CAS:57-10-3 MolWeight:256 RetIndex:1968

CompName:n-Hexadecanoic acid \$ Hexadecanoic acid \$ n-Hexadecanoic acid \$ Palmitic acid \$ Pentadecanecarboxylic acid \$ 1

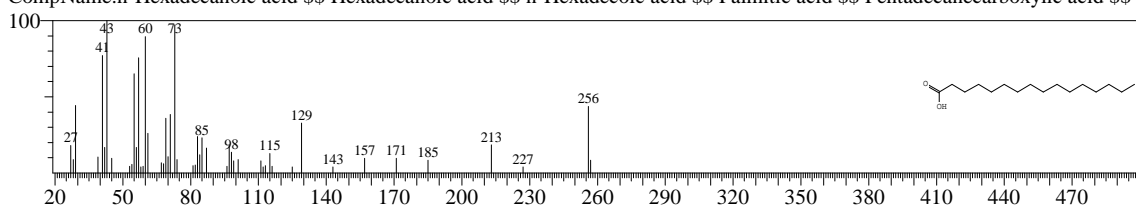

Hit#:2 Entry:20371 Library:NIST05s.LIB

SI:92 Formula:C15H30O2 CAS:1002-84-2 MolWeight:242 RetIndex:1869

CompName:Pentadecanoic acid \$ Pentadecylic acid \$ n-Pentadecanoic acid \$ n-Pentadecylic acid \$

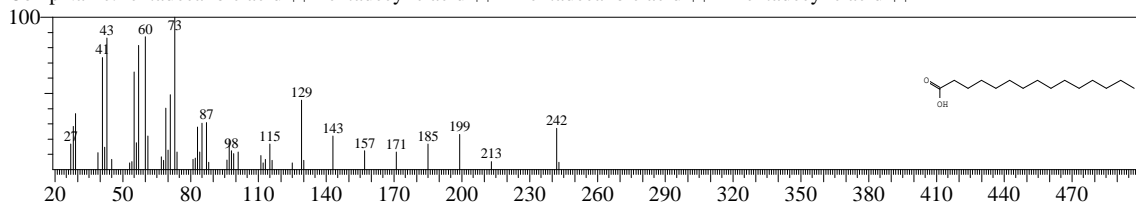

Hit#:3 Entry:161860 Library:NIST05.LIB

SI:92 Formula:C38H68O8 CAS:28474-90-0 MolWeight:652 RetIndex:4765

CompName:l-(+)-Ascorbic acid 2,6-dihexadecanoate

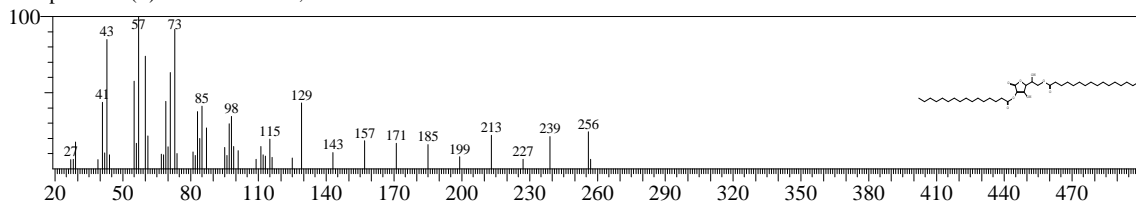

Hit#:4 Entry:74999 Library:NIST05.LIB

SI:91 Formula:C16H32O2 CAS:57-10-3 MolWeight:256 RetIndex:1968

CompName:n-Hexadecanoic acid \$ Hexadecanoic acid \$ n-Hexadecanoic acid \$ Palmitic acid \$ Pentadecanecarboxylic acid \$ 1

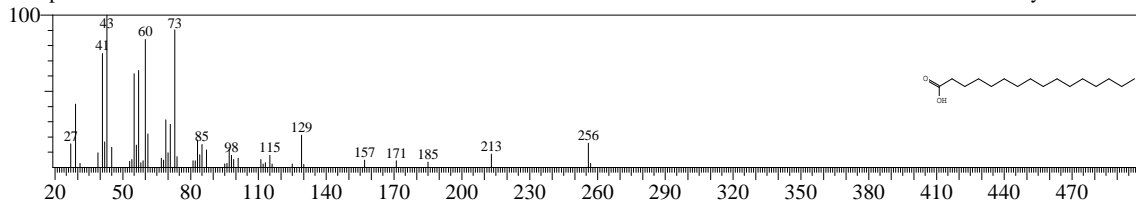

Hit#:5 Entry:22979 Library:NIST05s.LIB

SI:90 Formula:C18H36O2 CAS:57-11-4 MolWeight:284 RetIndex:2167

CompName:Octadecanoic acid \$ Stearic acid \$ n-Octadecanoic acid \$ Humko Industrere R \$ Hydrofol Acid 150 \$ Hystrene :

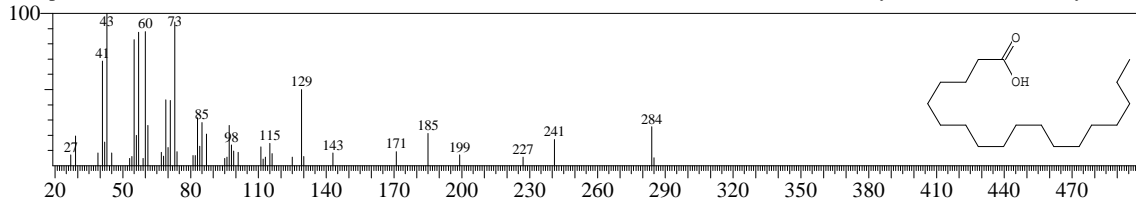

<< Target >>

Line#:19 R.Time:24.400(Scan#:2569) MassPeaks:330 BasePeak:174.00(20413)

RawMode:Averaged 24.392-24.408(2568-2570) BG Mode:Calc. from Peak

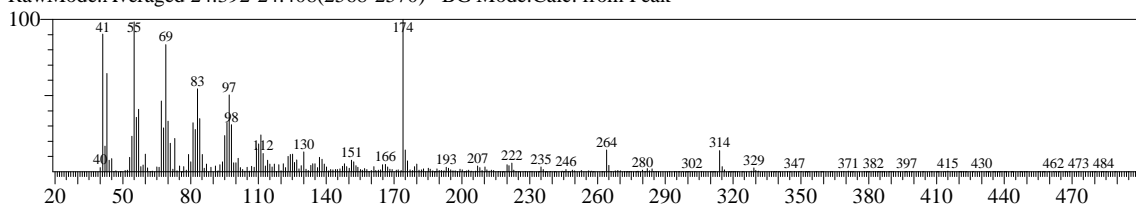

Hit#:1 Entry:90577 Library:NIST05.LIB

SI:89 Formula:C18H34O2 CAS:112-80-1 MolWeight:282 RetIndex:2175

CompName:Oleic Acid \$\$ 9-Octadecenoic acid (Z)- \$\$ .delta.(Sup9)-cis-Oleic acid \$\$ cis-.delta.(Sup9)-Octadecenoic acid \$\$ cis-C

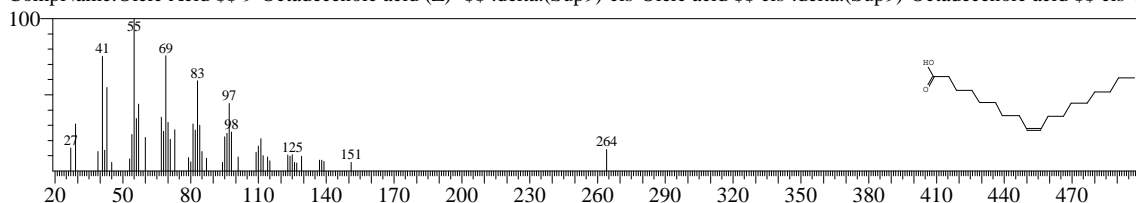

Hit#:2 Entry:90568 Library:NIST05.LIB

SI:88 Formula:C18H34O2 CAS:593-39-5 MolWeight:282 RetIndex:2175

CompName:6-Octadecenoic acid, (Z)- \$\$ (6Z)-6-Octadecenoic acid # \$\$

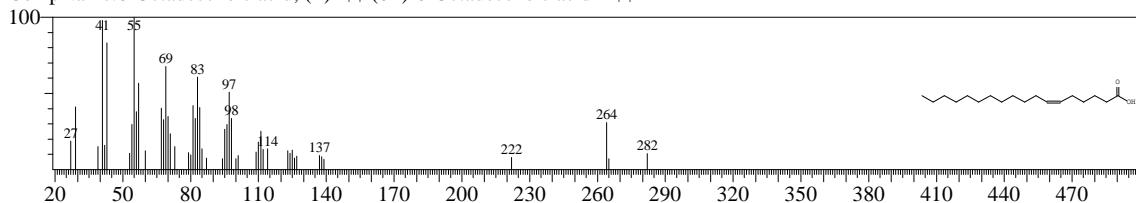

Hit#:3 Entry:65295 Library:NIST05.LIB

SI:87 Formula:C15H28O2 CAS:4727-18-8 MolWeight:240 RetIndex:2158

CompName:Cyclopentadecanone, 2-hydroxy- \$\$ 2-Hydroxycyclopentadecanone # \$\$

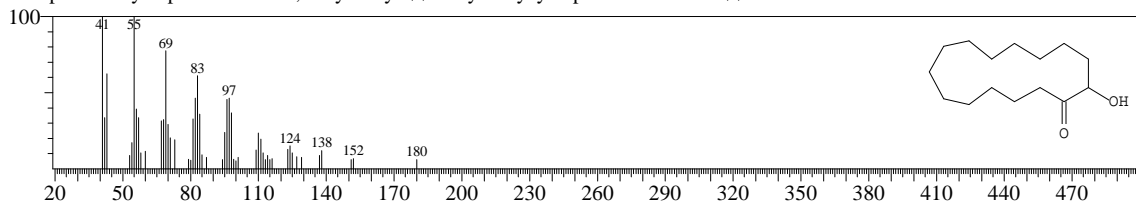

Hit#:4 Entry:90575 Library:NIST05.LIB

SI:86 Formula:C18H34O2 CAS:0-0-0 MolWeight:282 RetIndex:2175

CompName:Octadec-9-enoic acid

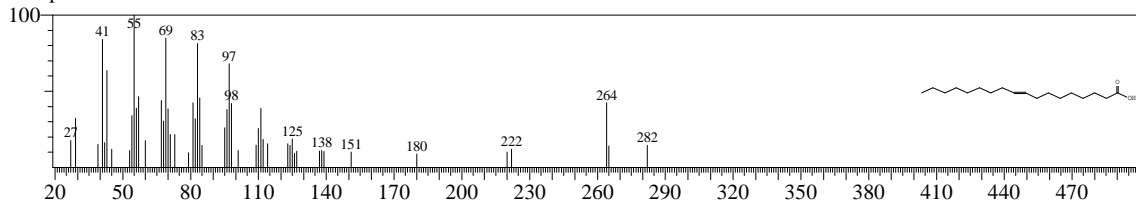

Hit#:5 Entry:22872 Library:NIST05s.LIB

SI:86 Formula:C18H34O2 CAS:112-79-8 MolWeight:282 RetIndex:2175

CompName:9-Octadecenoic acid, (E)- \$\$ trans-.delta.(sup 9)-Octadecenoic acid \$\$ trans-.delta.9-Octadecenoic acid \$\$ trans-Octad

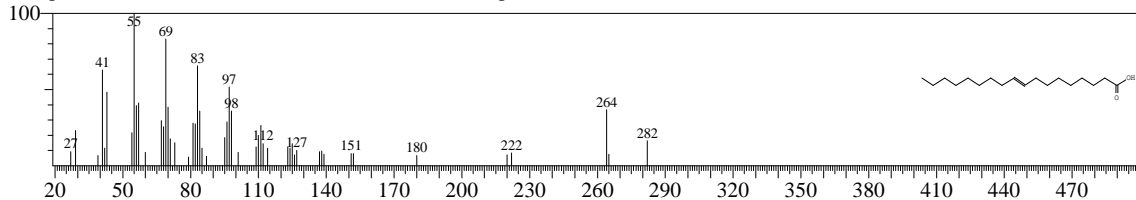

<< Target >>

Line#:20 R.Time:24.592(Scan#:2592) MassPeaks:279 BasePeak:73.00(4647)

RawMode:Averaged 24.583-24.600(2591-2593) BG Mode:Calc. from Peak

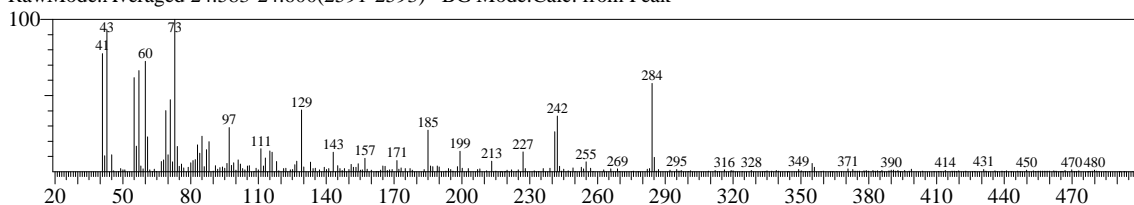

Hit#:1 Entry:22979 Library:NIST05s.LIB

SI:88 Formula:C18H36O2 CAS:57-11-4 MolWeight:284 RetIndex:2167

CompName:Octadecanoic acid \$\$ Stearic acid \$\$ n-Octadecanoic acid \$\$ Humko Industrere R \$\$ Hydrofol Acid 150 \$\$ Hystrene :

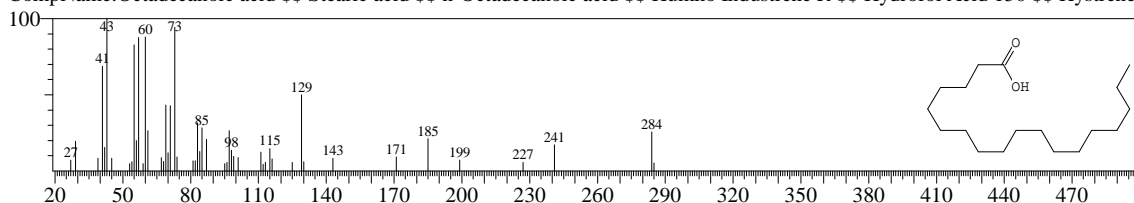

Hit#:2 Entry:91895 Library:NIST05.LIB

SI:87 Formula:C18H36O2 CAS:57-11-4 MolWeight:284 RetIndex:2167

CompName:Octadecanoic acid \$\$ Stearic acid \$\$ n-Octadecanoic acid \$\$ Humko Industrere R \$\$ Hydrofol Acid 150 \$\$ Hystrene :

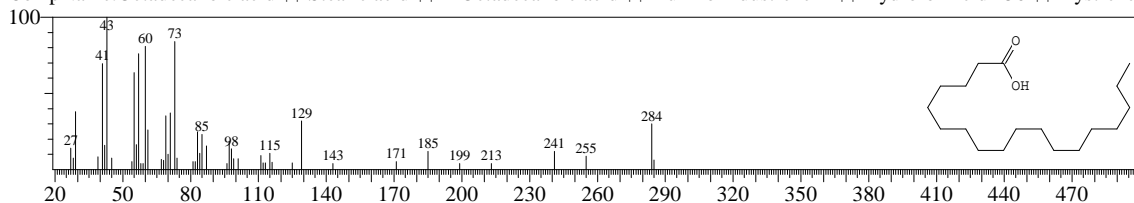

Hit#:3 Entry:20371 Library:NIST05s.LIB

SI:87 Formula:C15H30O2 CAS:1002-84-2 MolWeight:242 RetIndex:1869

CompName:Octadecanoic acid \$\$ Pentadecylic acid \$\$ n-Pentadecanoic acid \$\$ n-Pentadecylic acid \$\$

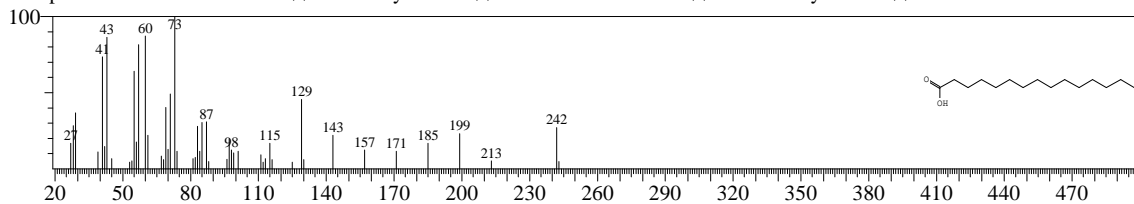

Hit#:4 Entry:22978 Library:NIST05s.LIB

SI:86 Formula:C18H36O2 CAS:57-11-4 MolWeight:284 RetIndex:2167

CompName:Octadecanoic acid \$\$ Stearic acid \$\$ n-Octadecanoic acid \$\$ Humko Industrere R \$\$ Hydrofol Acid 150 \$\$ Hystrene :

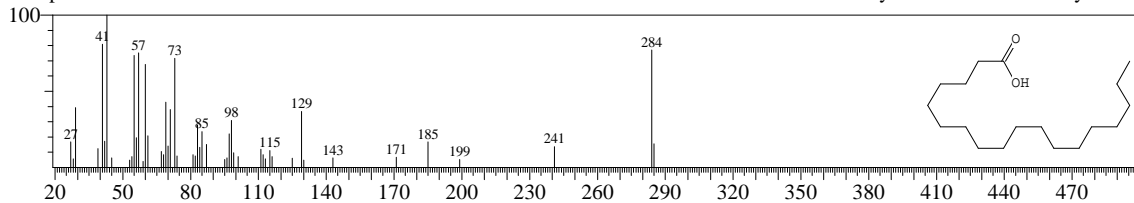

Hit#:5 Entry:22977 Library:NIST05s.LIB

SI:86 Formula:C18H36O2 CAS:57-11-4 MolWeight:284 RetIndex:2167

CompName:Octadecanoic acid \$\$ Stearic acid \$\$ n-Octadecanoic acid \$\$ Humko Industrere R \$\$ Hydrofol Acid 150 \$\$ Hystrene :

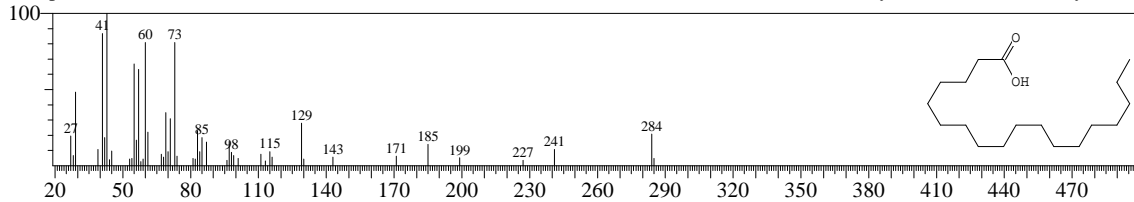

Supplement: Fig.2,3_&_table_2-Taicangbaipi-raw_data.pdf [file Fig.2%2C3_%26_table_2-Taicangbaipi-raw_data.pdf]
