# Supplementary material for: Comparative study on the composition of four different varieties of garlic
Source: PeerJ. 2019 Feb 21;7:e6442. doi: 10.7717/peerj.6442 (PMC6387757; doi:10.7717/peerj.6442)
Supplement: Supplemental Information 13 [file peerj-07-6442-s013.xlsx]

## Sheet: Sheet1
4												average value	SD
0	2.752	1.919	1.692	1.793	1.568	1.9448	1.41506	0.986734	0.870012	0.921946	0.806253	1	0.241337
1/32	1.979	1.121	0.95	0.924	1.112		1.01759	0.576409	0.488482	0.475113	0.571781	0.625874	0.223839
1/16	1.479	1.17	0.857	0.794	1.153		0.76049	0.601604	0.440662	0.408268	0.592863	0.560777	0.141658
1/8	0.637	0.44	0.488	0.527	0.529		0.32754	0.226244	0.250926	0.270979	0.272007	0.269539	0.0373938
1/4	0.13	0.101	0.112	0.121	0.1		0.0668449	0.0519334	0.0575895	0.0622172	0.0514192	0.0580008	0.00663885
1/2	0.313	0.289	0.288	0.273	0.283		0.160942	0.148601	0.148087	0.140374	0.145516	0.148704	0.00757801
3												0
0	1.887	1.42	1.361	1.604	1.676	1.5896	1.18709	0.893306	0.85619	1.00906	1.05435	1	0.132386
1/32	0.619	0.908	0.721	0.759	1.062		0.389406	0.571213	0.453573	0.477479	0.668093	0.511953	0.108979
1/16	0.464	0.538	0.484	0.433	0.497		0.291897	0.33845	0.304479	0.272396	0.312657	0.303976	0.0245321
1/8	0.492	0.467	0.44	0.441	0.459		0.309512	0.293785	0.276799	0.277428	0.288752	0.289255	0.0134734
1/4	0.256	0.262	0.271	0.25	0.263		0.161047	0.164821	0.170483	0.157272	0.16545	0.163815	0.00496542
1/2	0.111	0.112	0.11	0.113	0.121		0.0698289	0.070458	0.0691998	0.0710871	0.0761198	0.0713387	0.0027637
2												0
0	1.333	1.267	1.609	1.832	1.89	1.5862	0.840373	0.798764	1.01437	1.15496	1.19153	1	0.1781
1/32	1.778	1.367	1.684	1.404	1.41		1.12092	0.861808	1.06166	0.885134	0.888917	0.963687	0.118807
1/16	1.092	1.476	1.421	1.071	1.257		0.688438	0.930526	0.895852	0.675199	0.79246	0.796495	0.116449
1/8	1.445	0.933	0.73	0.983	0.81		0.910982	0.588198	0.460219	0.61972	0.510654	0.617955	0.175462
1/4	0.833	0.785	0.699	0.856	0.644		0.525154	0.494893	0.440676	0.539655	0.406002	0.481276	0.0566423
1/2	0.836	0.686	0.441	0.784	0.495		0.527046	0.43248	0.278023	0.494263	0.312067	0.408776	0.109894
1												0
0	1.427	1.813	1.734	1.637	1.458	1.6138	0.884248	1.12344	1.07448	1.01438	0.903458	1	0.104534
1/32	1.542	1.398	1.823	1.559	1.29		0.955509	0.866278	1.12963	0.966043	0.799356	0.943363	0.124537
1/16	1.107	1.779	1.72	1.201	1.34		0.685959	1.10237	1.06581	0.744206	0.830338	0.885736	0.188657
1/8	1.111	1.336	1.295	1.122	1.383		0.688437	0.82786	0.802454	0.695253	0.856984	0.774198	0.0776508
1/4	1.293	1.128	1.156	1.063	1.141		0.801215	0.698971	0.716322	0.658694	0.707027	0.716446	0.0522377
1/2	0.537	0.749	0.65	0.683	0.67		0.332755	0.464122	0.402776	0.423225	0.415169	0.407609	0.0477525
ershuizao	100	62.5874	56.0777	26.9539	14.8704	5.80008
hongqixing	100	51.1953	30.3976	28.9255	16.3815	7.13387
Single-clove	100	96.3687	79.6495	67.9549	48.1276	40.8776
taicangbaipi	100	94.3363	88.5736	77.4198	71.6446	40.7609
